1 *In Silico* Identification of Three Types of Integrative and Conjugative Elements (ICEs) in  
2 *Elizabethkingia anophelis* Strains Isolated from Around the World

3 Jiannong Xu<sup>a#</sup> Dong Pei<sup>a\*</sup>, Ainsley Nicholson<sup>b</sup>, Yuhao Lan<sup>a</sup>, Qing Xia<sup>a</sup>

4 <sup>a</sup>Biology Department, New Mexico State University, Las Cruces, NM, USA

5 <sup>b</sup>Special Bacteriology Reference Laboratory, Bacterial Special Pathogens Branch, Division of  
6 High-Consequence Pathogens and Pathology, Centers for Disease Control and Prevention,  
7 Atlanta, Georgia, USA

8 Running Head: Three types of ICE in various strains of *E. anophelis*

9 #Address correspondence to Jiannong Xu, [jxu@nmsu.edu](mailto:jxu@nmsu.edu).

10 \*Present address: Dong Pei, Department of Biostatistics, University of Kansas Medical  
11 Center, Kansas City, KS, USA

12

13

14

15

16

17

18

19

20

21

22

23

24

25

26

27 **ABSTRACT**

28 *Elizabethkingia anophelis* is an emerging global multidrug-resistant opportunistic pathogen.  
29 We assessed the diversity among 13 complete genomes and 23 draft genomes of *E. anophelis*  
30 derived from various environmental settings and human infections from different geographic  
31 regions around the world over past decades from 1950s. Thirty-one of these 36 strains harbor  
32 integrative and conjugative elements (ICEs). A total of 52 ICEs were identified, and  
33 categorized into three ICE types based on the architecture of signature genes in the  
34 conjugation module. The type II and III ICEs were found to integrate into regions adjacent to  
35 tRNA genes, while type I ICEs used a variety of integration sites, inserting into intergenic  
36 regions or even directly into a gene, sometimes disrupting gene function. Integrases such as  
37 tyrosine recombinases, serine recombinases and DDE transposases were found in most ICEs.  
38 The ICEs carry various cargo genes including transcription regulators and those involved in  
39 antibiotic resistance. The CRISPR-Cas system was found in nine strains, including four  
40 strains in which CRISPR-Cas machinery and ICEs co-exist. ICE distribution in the strains  
41 showed no geographic or temporal patterns. The ICEs in *E. anophelis* differ in gene structure  
42 and sequence from CTnDOT, a well-studied ICE prevalent in *Bacteroides* spp. This is the  
43 first set of ICEs identified in the family Flavobacteriaceae. As a prevalent type of mobile  
44 genetic elements in various strains of *E. anophelis* around the world, the categorization of  
45 ICEs will facilitate further investigations such as virulence, genome epidemiology and  
46 adaptation genomics of *E. anophelis*.

47 **Importance**

48 *Elizabethkingia anophelis* is an opportunistic human pathogen, and the genetic diversity  
49 between strains from around the world becomes apparent as more genomes are sequenced.  
50 The Integrative Conjugative Element (ICE), found in many bacterial species, contains genes

51 for transfer via conjugation and integration into the chromosome, along with various cargo  
52 genes. ICEs are identified in 31 of 36 strains and categorized into three types based on  
53 architecture of modular genes, integrases, and integration sites. ICE distribution in different  
54 strains displays no spatial and temporal patterns. Several ICE-containing strains also  
55 possessed CRISPR-Cas units, considered to be the bacterial adaptive immune system  
56 providing protection against phage and predatory mobile genetic elements. This co-existence  
57 suggests that ICEs are beneficial or at least not harmful to the bacterial cells they inhabit.  
58 ICEs as a component of the mobile genetic repertoire enable recipients to resist antibiotics,  
59 survive disinfecting agents, and adapt to various ecological niches.

60

61

62

63

64

65

66

67

68

69

70

71

72

73

74

75

## 76 **Introduction**

77           The genus *Elizabethkingia* belongs to family *Flavobacteriaceae*, and was recognized  
78 as distinct from the genus *Chryseobacterium* in 2005 (1). The two species initially recognized  
79 were *E. meningoseptica*, named based on its initial isolation as the causative agent for  
80 neonatal meningitis (2), and *E. miricola*, an isolate obtained from condensation water of  
81 Space Station Mir (3). A third species, *E. anophelis*, was proposed in 2011(4) based on the  
82 description of the type strain R26<sup>T</sup> that was originally isolated from the midgut of *Anopheles*  
83 *gambiae* mosquitoes maintained in Stockholm University in Sweden (5). In 2015, a new  
84 species, *E. endophytica* was proposed (6) but whole genome sequence (WGS) based genome  
85 comparison revealed it to be a homotypic synonym of *E. anophelis* (7, 8). Additional species  
86 have since been added to the genus (8).

87           In 2011, the first human infection attributed to *E. anophelis* was documented, a  
88 neonatal meningitis that occurred in Central Africa Republic (9). Later, an *E. anophelis*  
89 outbreak in an intensive-care unit in Singapore was reported (10), followed by the worrying  
90 account of *E. anophelis* transmission from a mother to her infant (11). In 2016, a large *E.*  
91 *anophelis* outbreak occurring in Wisconsin, USA, was unusual in that a substantial proportion  
92 of patients were not already hospitalized, and were instead admitted directly from their homes.  
93 No indication of human-to-human transmission was found (12-14). Human cases of *E.*  
94 *anophelis* have been reported with increasing frequency around the world (13, 15-17), aided  
95 in part by improved identification methods, and several strains previously described as *E.*  
96 *meningoseptica* were determined to actually belong to the *E. anophelis* species (18). In  
97 addition to human-derived strains, multiple strains of the species have been isolated from its  
98 namesake, the mosquito, and their genomes have been sequenced. Both the type strain R26<sup>T</sup>  
99 and strain Ag1 were derived from *An. gambiae* mosquitoes (19, 20). Strain EaAs1 was  
100 isolated from *An. stephensi* mosquitoes (21), and strains AR4-6 and AR6-8 were obtained

101 from wild caught specimens of the mosquito *An. sinensis* in China (20). There has been no  
102 epidemiological link between human cases and mosquitoes, and the circumstances of certain  
103 outbreaks preclude any possibility of mosquitos being a vector for *E. anophelis*.

104 Genome comparison of pathogenic bacteria has greatly increased our understanding  
105 of the evolution, pathogenesis and epidemiology in many pathogen outbreak investigations  
106 (22-26). Horizontal transfer of mobile genetic elements between bacterial strains occurs  
107 continually, and is a major source of genetic variation in bacteria (27). One group of modular  
108 mobile genetic elements, known as integrative and conjugative elements (ICEs), are capable  
109 of transferring between bacteria horizontally via conjugation (28-30). ICEs integrate into a  
110 host chromosome and replicate along with the genome (28, 31). The cargo genes that are  
111 brought in by the ICEs may endow the recipient bacteria with new phenotypes (32). For  
112 example, in *Pseudomonas syringae* pv. *actinidiae*, resistance to copper, arsenic and cadmium  
113 was attributed to the resistant genes that were carried in ICEs (33). In *Helicobacter pylori*,  
114 ICE *tfs4* has been identified in certain strains mediating gastric disease. The presence of *tfs4*  
115 ICE has been associated with virulence, although mechanisms behind the virulence  
116 phenotype remain unknown (34).

117 Genome analysis of various *E. anophelis* strains has revealed substantial genetic  
118 diversity (11, 16, 35-39). The ICE named ICEEa1 has been identified in the strains associated  
119 with the outbreak in Wisconsin, and unrelated strains from the outbreak in Singapore (40). In  
120 this study, we searched for ICEs in 13 complete and 23 draft genomes of *E. anophelis* strains  
121 around the world by locating clusters of transfer (*tra*) genes. Based on the architecture of  
122 conjugation modules and associated signature genes, three types of ICEs were recognized. As  
123 *E. anophelis* is recognized as an environmental bacterium, the high prevalence and diversity  
124 of ICEs as well as the mosaic integration pattern in different strains suggest that ICEs play a

125 significant role in shaping its genome to adapt to different environmental niches. In recent  
126 years, whole-genome sequencing has been utilized in epidemiological studies to type  
127 outbreak strains, acquire genomic determinants of virulence and antibiotic resistance in  
128 outbreaks, and estimate pan-genome diversity (41-44). The identification and classification  
129 of ICEs is expected to facilitate the genomic epidemiological studies of the pathogenic strains  
130 of *E. anophelis* in the future.

## 131 **Results**

### 132 **Origin and geographic distribution of the strains**

133 In this study, 13 complete genomes and 23 draft genomes of *E. anophelis* were  
134 compared. Mosquito-derived strains included R26<sup>T</sup> and Ag1 from *An. gambiae* (19, 20),  
135 EaAs1 from *An. stephensi* (21) and AR4-6 and AR6-8 from wild caught *An. sinensis* (20).  
136 Strains that were associated with human infections and recent outbreaks were from the  
137 Central Africa Republic (9, 39), Singapore (35), Hong Kong (11), China (45), Wisconsin,  
138 USA (13, 14), and Taiwan (16). Geographic distribution of included isolates was spread  
139 across Asia, Europe, Africa and North America (Figure 1). The available metadata for the  
140 strains is noted in Table 1, along with the WGS accession numbers.

### 141 **Core genome based phylogeny of the strains**

142 The pan-genome of a bacterial species is comprised of a core and an accessory  
143 genome. The core genome is a set of genes that are conserved and shared by all strains while  
144 the accessory gene set is shared by only some strains (46, 47). Because the core genome  
145 contains essential genes and their inheritance is necessitated, they carry more reliable  
146 evolutionary information for inferring phylogeny than do accessory genes. Hence, single  
147 nucleotide polymorphism (SNP) typing based on core genome comparison has become a

148 recognized method for accurate evolutionary reconstructions (48, 49). We used the core  
149 genome alignment to generate a SNP tree to infer phylogeny of the strains, which was  
150 implemented by Parsnp in the Harvest suite (49). Parsnp recognized 37781 anchors and 985  
151 maximal unique matches (MUMs) in the 36 genomes, a total of 37764 anchors and MUMs  
152 were used to anchor the genome alignment and make a SNP tree (49). The tree topology  
153 appeared similar when each of the complete genomes R26<sup>T</sup>, 0422, CSID3015183678 and  
154 NUHP1 was used as reference for core genome alignment (data not shown). The strains were  
155 sorted into three clusters (Figure 1, Table 1). Cluster I contained 14 strains with the genome  
156 of 12012-2\_PRCM at the basal position. Cluster II consisted of two clades, each included six  
157 strains. The strains in this cluster were globally distributed and collected over decades  
158 between the 1950s and the present. Cluster III had two clades as well. One was comprised of  
159 all five mosquito-derived strains, the other contained strain 37-75 obtained from a human  
160 infection in France in 1979 and strain CSID3015183678, which was a representative of the  
161 strains associated with the Wisconsin outbreak in 2016 (40). There was no indication of  
162 geography-based clustering. In each cluster, there were strains that were very closely related,  
163 which were marked as B, C, D and E in the tree (Figure 1). The clustering of these strains  
164 was corroborated by the higher percent identity in the protein sequences between the  
165 genomes. The overall identity was greater than 99.9% in the clades B, C, D and E (Figure 1).  
166 In the clade A, the strain isolated from a carp in France was closely related to the two isolates  
167 that were derived from human patients in Central Africa in 2006 and 2011, respectively (9,  
168 39). In the clade C, 3375 was isolated from South Carolina, US, in 1957, and F3543 was  
169 isolated from Florida, US, in 1982, while FDAARGOS\_198 was obtained in Sweden. In the  
170 clade D, 0422 was collected in Florida, US, in 1950, and PW2806 and PW2809 were isolated  
171 in Hong Kong in 2012. The clade E grouped the strains from three different mosquito species,  
172 *An. gambiae*, *An. stephensi* and *An. sinensis*, and these strains were collected in different

173 geographic locations in separate times. The clade A presented a group of strains with certain  
174 distance, in which the identity of protein sequences was between 95-100% in a pairwise  
175 comparison. Overall, it appears that closely related strains can be widely separated both  
176 temporally and spatially.

## 177 **Identification of ICEs in the strains**

178 Structurally, ICEs consist of the modules for genome integration and excision,  
179 conjugative transfer, and maintenance (31). We define a genome neighborhood as an ICE if it  
180 harbors genes encoding a relaxase, a coupling protein VirD4 ATPase (T4CP) and several *Tra*  
181 proteins. Among the 36 strains, 31 contained at least one ICE, and a total of 52 ICEs were  
182 detected (Table 2). According to the architecture of the modular genes, these ICEs were  
183 classified into three types (Figure 2).

184 Type I ICEs are featured by 13 *tra* genes (*traABBDEGIJKMNOQ*) in addition to  
185 genes coding for T4CP, relaxase and integrase. In most cases, genes *t4cp* and *relaxase* were  
186 located tandemly at upstream of the *tra* gene cassette, and *integrase* was located at  
187 downstream of the *tra* cassette (Figure 2). A total of 12 ICEEaI elements were found in 11  
188 strains, with strain FDAARGOS-198 harboring two ICEEaIs (Table 2). The integration site  
189 varied. Each of the 12 elements had a distinct insertion site (Figure 3). The type I ICE in  
190 CSID3015183678 has been characterized previously, named as ICEEa1 (40). This element  
191 inserted into and disrupted the gene encoding MutY, which is an adenine DNA glycosylase  
192 that is required for fixing G-A mis-pairs, making the strain more prone to mutation (40). The  
193 type I ICE in strain 37-75 inserted into the gene encoding an alkyl hydroperoxide reductase  
194 (Ahp) between codons K207 and I208. This protein is a primary scavenger of H<sub>2</sub>O<sub>2</sub> in *E.coli*  
195 (50). Its disruption by the ICE may result in a loss of function and make the strain vulnerable  
196 to oxidative stress. The integration sites of the remaining nine type I ICEs were in the



197 intergenic regions. The locations of these elements were listed in Table 2 and marked in  
198 Figure 3. Interestingly, The *ICEEaI*(1) was shared by four strains, CSID3015183678  
199 (Wisconsin, US, 2015) , NUPH1 (Singapore, 2012), 3375 (South Carolina, US, 1957) and  
200 FDAARGOS-198 (Sweden, collection time unknown). The sequences of the element were  
201 nearly identical, but inversion sites were different, indicating that the integrations occurred  
202 independently.

203 Type II ICEs were identified in 13 strains. Unlike in type I, genes *t4cp* and *relaxase*  
204 were separated by one or more CDS, followed by 13 *tra* genes, *traABCDEFGHIJKMNOQ*. A  
205 gene is located between *traD* and *traE*, encoding a RadC-domain-containing protein (Figure  
206 2). All 13 *ICEEaII*s integrated next to a tRNA gene, 12 elements reside at the 3' end of the  
207 tRNA-Leu-CAA. Only the *ICEEaII* in NUHP1 was inserted after the tRNA-Ser-GGA (Table  
208 2, Figure 3). Integrase were found in 4 of the 13 elements (see below).

209 Type III ICEs were recognized in 16 strains. The structure was quite different from  
210 that in type I and II ICEs, with only seven *tra* genes present, *traAEGJKMN*. The *relaxase* and  
211 *t4cp* flank the *tra* genes. In 11 out of 16 elements, a gene is present after the *traN*, encoding a  
212 large protein (791-1177 aa) with a RadC domain (Figure 2). Like *ICEEaII*, the type III ICEs  
213 after a tRNA gene. The tRNA-Arg-ACG, tRNA-Gln-TTG, tRNA-Asp-TGA, tRNA-Ser-  
214 TGA, and tRNA-Glu-TTC were targeted by *ICEEaIII*s (Figure 3). In NUHP1, two type III  
215 elements, *ICEEaIII*(7) and *ICEEaII*(8), are co-located between two tRNA-Asp-GTC, and the  
216 two elements are separated by a tRNA-Asp-GTC. In NUH11, *ICEEaI*(8) and *ICEEaIII*(12)  
217 combined as one segment, co-localized between the tRNA-Asp-GTC and the gene encoding a  
218 beta-lactamase. In most type III elements, at least one integrase gene is present.

219 In sum, a total of 52 ICEs were identified in 31 genomes, and 15 elements in 11 draft  
220 genomes were partially assembled. The size of ICEs is up to 116.3 kb in complete genomes.

221 Annotated ICEs were listed in Table S1, which included predicted CDS and gene functions.  
222 Some strains had more than one ICE. No ICEs were found in five strains: PW2810, B2D,  
223 8707, CIP11067 and GTC\_10754 (Table 2).

#### 224 **Phylogenetic relationship of the ICEs**

225 To track the evolutionary history of these ICEs, the nucleotide sequences of the genes  
226 encoding relaxase, T4CP, TraG and TraJ from each ICE were compared. As shown in Figure  
227 4, in all four gene trees, the ICEs were separated based on their types. The type I and II  
228 elements are more closely related, forming a clade distinct from the type III clade. This  
229 pattern was consistent with the type classification based on the structure of the conjugation  
230 module (Figure 2). The distribution of the ICE types did not imply geographic or temporal  
231 patterns.

#### 232 **Integrases**

233 Integrases, required for ICE integration and excision, could be tyrosine or serine  
234 recombinases, or DDE transposases containing an acidic amino acid triad (DDE)(32).  
235 Tyrosine recombinases were found in all type I and III ICEs, and DDE transposases were  
236 identified in four type III ICEs. In the 12 type II ICEs, only four elements carried integrases.  
237 Two serine recombinases were detected in NCTC10588 and one was identified in JM-87. A  
238 DDE transposase was found in FMS-007, and a tyrosine recombinase was detected in  
239 NUHP1. The remaining 9 type II ICEs lack co-localized integrases (Table S1).

#### 240 **Cargo genes**

241 Restriction and modification (R-M) systems provide an innate defense against  
242 invading DNA to protect the genome stability. Mobile genetic elements (including ICEs)  
243 usually carry an R-M system, which enables an evolutionary interplay between the mobile

244 genetic elements (MGEs) and their hosts (51). The DNA modification methylase, type I R-M  
245 system, and type II restriction enzymes were prevalent in the ICEs of all three types. In  
246 addition, the anti-restriction protein ArdA was detected in three type II ICEs and one type III  
247 ICE. Some ICEs also carried DNA topoisomerase, DNA helicase, DNA primase, DNA  
248 polymerase. These enzymes may be involved in the integration process, and perhaps in DNA  
249 replication while the ICE is in its plasmid state. Genes encoding proteins in the resistance-  
250 nodulation-division (RND) family (52), a multidrug efflux pump system found in Gram-  
251 negative bacteria, are prevalent in the ICEs. The genes coding for three key component  
252 proteins of the tripartite RND complex (the outer membrane protein, membrane fusion  
253 protein and inner membrane protein), are carried in the type I ICEs in six strains, one of the  
254 three type III ICEs in NUHP1 and the type II ICE in F3543 (Table S1). ABC transporters for  
255 various substrates, such as manganese, potassium and oligopeptides were found in all ICEs.  
256 TonB-dependent receptors for siderophore import or carbohydrates uptake (SusC) are present  
257 in some ICEs. There are various transcriptional regulators in the ICEs, such as AraC  
258 family, ArsR family, MarR family, HxIR family, and TetR family. The AraC family  
259 transcriptional regulators (AFTRs) are most prevalent, a total of 36 these were found in 19  
260 strains. In addition, two-component regulatory system are present in the type I ICEs in  
261 three strains.

## 262 **CRISPR-Cas loci**

263 The CRISPR-Cas system is a prokaryotic adaptive defense machinery against  
264 invading nucleic acids (53, 54). The type II-C CRISPR-Cas system was detected in nine  
265 strains (Table 1), which is featured by a CRISPR array and the genes encoding Cas9, Cas1  
266 and Cas2 proteins. In these nine strains, the CRISPR-Cas system is located downstream of  
267 the gene encoding a cobalt-zinc-cadmium resistance protein CzcD. In a CRISPR array, the  
268 direct repeat is 47 nt, and the spacer is 30 nt in length. The number of spacers varies between

269 6 in strain CIP111046 to 47 in strain CIP111067. No CRISPR locus was detected in the draft  
270 assembly of strain 8707, but one complete direct repeat was identified in the assembly. Likely  
271 the CRISPR locus was not assembled well in the draft genome. The CRISPR loci of strains  
272 Po0527107 and V0378064 have been described previously (39). Po0527107 has 21 spacers  
273 and V0378064 has the same 21 plus two more spacers. Both strains were isolated in Bangui,  
274 the Central Africa Republic, but five years apart (9, 55). Strain LDVH-AR107 has two  
275 CRISPR loci, each with 21 spacers. LDVH-AR107 shares 12 spacers with both Po0527107  
276 and V0378064 despite being isolated on a different continent, from the internal organ of a  
277 common carp *Cyprinus carpio* collected in 2004 in Montpellier, France (Table 1).

## 278 **Discussion**

279 Many genomes have been sequenced for *E. anophelis* strains derived from different  
280 sources including mosquitoes, human infections, hospital environments, fish and corn stems.  
281 This genome availability enabled a comparative genomics approach to investigate the genetic  
282 architecture and repertoire of the *E. anophelis* population.

### 283 ***Core genome based phylogeny***

284 By definition, the core genome is shared by all strains and consists of essential genes  
285 that are vertically transmitted while genes in the accessory genome are present only in a  
286 subset of strains. The sum of the core and accessory genomes in all strains constitutes a pan-  
287 genome for the species (47, 56, 57). Due to its inheritability, the core genome is intrinsically  
288 suitable for inferring phylogeny (49). The core genome phylogenetic analysis separated the  
289 strains into three clusters, however, genetically similar strains do not show a spatial or  
290 temporal aggregation pattern. As an example, clade C (Figure 1) contains closely related  
291 strains F3543, 3375 and FDAARGOS-198, the locations where they were isolated were  
292 Florida in 1982, South Carolina in 1957 and Sweden (collection time unknown), respectively

293 (Table1, Figure 1). On the other hand, the mosquito-associated strains were very closely  
294 related, and distinct from the strains derived from human infections (Figure 1), despite having  
295 been isolated from three different mosquito species, and from both lab reared (19, 21) and  
296 wild caught mosquitoes (20). The possibility that they might be lab contaminants was  
297 carefully evaluated, and rejected based on the timeline of sample collection, processing and  
298 sequencing. Furthermore, the presence of *E. anophelis* in the gut microbiota of wild  
299 populations of *An. gambiae* in Kenya and *An. sinensis* mosquitos in Shandong, China, has  
300 been confirmed from the shotgun metagenomic sequencing data (Xu, unpublished data).  
301 Association of *E. anophelis* has been documented in several different mosquito species,  
302 including *An. gambiae* (58), *Culex quinquefasciatus* (59) and *Aedes aegypti* (60), and a role  
303 for the bacteria in larval development has been hypothesized. Taken together, these results  
304 indicate that there is selection in the mosquito gut environment for these specific strains.

### 305 ***ICEs in the strains***

306 Genome diversification promotes bacterial adaptation and evolution. ICE, as a type of  
307 mobile genetic elements, contributes significantly to the pan-genome reservoir with  
308 potentially adaptive genes (28, 31). Several ICEs have been found in the taxa of *Bacteroides*  
309 (29, 61-64), which belong to the family Bacteroidaceae in phylum Bacteroidetes. Of these  
310 elements, CTnDOT in *B. thetaiotaomicron* has been studied extensively (65-68). The ICEs  
311 identified in *E. anophelis* are structurally distinct from CTnDOT.

312 The conjugation machinery is a necessary component of ICEs. Relaxase, coupling  
313 protein and *tra* proteins are required for element excision from the genome and transfer to a  
314 recipient (69). Conserved features indicative of conjugative elements have been used for  
315 identifying ICEs in a wide variety of genomes (29). Using this approach, we categorized the  
316 ICEs in *E. anophelis* strains into three types based on the architecture of the genes in the

317 conjugation module and the phylogeny of sequences from four genes in the module (Figure 2,  
318 4). Type II and III ICEs tended to integrate adjacent to a tRNA gene, while the type I ICEs  
319 used a non-tRNA gene region for integration. In some strains, the type I ICE insertion into a  
320 gene resulted in the loss of function. For example, in CSID3015183678 the integration of ICE  
321 disrupted the gene *mutY*, which is required for excision of G-A mismatch (70, 71). The  
322 disruption of *mutY* by ICEEaI resulted in a higher rate of nonsynonymous to synonymous  
323 substitution in the strain and subsequent sublineages, which may fuel the adaptive capacity of  
324 an outbreak strain (40). In strain 37-75, the insertion of a type I ICE inactivates the gene  
325 encoding alkyl hydroperoxide reductase (Ahp). As the Ahp protein is a scavenger of  
326 hydrogen peroxide in *E. coli* (50), the disruption of the *ahp* gene by ICE may affect host  
327 defense against elevated oxidative stress. Twelve type II ICEs used tRNA-Leu-CAA as the  
328 integration locus, however, these elements lacked an integrase. This warrants further  
329 investigation to elucidate whether or not the type II ICEs are mobile without an integrase in  
330 the element. The presence of diverse integration loci, including tRNA gene and non-tRNA  
331 loci (Figure 3), suggests a high degree of genome plasticity of the *E. anophelis* in favor of a  
332 dynamic genetic repertoire of the pan-genome accommodating mobile elements like ICEs (28,  
333 63).

334         Among the cargo genes carried by the ICEs for which a function could be identified,  
335 most are involved with host defense, nutrient acquisition, or transcription regulation. Innate  
336 immune mechanisms like R-M systems provide host defense by protecting against invading  
337 DNA (51, 72), and the RND type multidrug efflux pumps enable the chemical defense by  
338 recognizing and expelling various structurally diverse compounds and toxins (73),  
339 including antibiotics, as shown previously in R26<sup>T</sup> (37), and the strains associated with the  
340 outbreak in Singapore (35, 36). Regarding nutrient acquisition, a variety of ABC transporters  
341 and TonB dependent receptors are present in the ICEs, which greatly enhances the host

342 capability to satisfy the nutrient needs in the environment they thrive. The ICEs also equip  
343 the host with a variety of transcriptional regulators, with those in the AraC family being  
344 particularly prevalent (Table S1). These transcription regulators can sense various chemical  
345 signals involved in carbon metabolism, quorum-sensing signaling, virulence and stress  
346 response, which leads to the expression of a global gene repertoire (74-77). Such genetic  
347 capability brought in by ICEs enables the host strains a broader adaptive flexibility to eco-  
348 niche changes, which may contribute to establishment of an infection in humans as well.

### 349 ***CRISPR loci***

350 CRISPR-Cas system is an adaptive immune mechanism against invading nucleic  
351 acids. Spacer sequences are acquired and integrated into the CRISPR locus. Upon  
352 encountering the same non-self invaders, the spacers will be transcribed into guide RNAs to  
353 direct Cas nuclease to cleave specific target sequences (53, 78). In this study, the class II  
354 CRISPR-Cas system was identified in nine strains of *E. anophelis*. A total of 209 spacers  
355 were recognized in eight strains. These spacers reflected previous events of the horizontal  
356 transfer of mobile elements or phage infections these strains have experienced in the past.  
357 Indeed, it has been shown by Breurec *et al.* (39) that strain V0378064 (isolate E18064 in (39))  
358 obtained in 2011 contained two newly acquired spacers, S22 and S23, which are a perfect  
359 match to two protospacers from the strain Po0527107 (isolate E27107) isolated in 2006. In  
360 fact, the two protospacers reside in a phage-derived mobile genetic element integrated at the  
361 3' end of tRNA-Arg-ACG in Po0527107. The phage element is absent from V0378064,  
362 likely due to the action of the CRISPR-Cas mediated defense.

363 Of nine strains that carry a CRISPR-Cas system, five have ICEs as well. The co-  
364 existence of mobile elements and CRISPR defense system suggests an evolutionary balance  
365 between the genome stability and plasticity. In the family *Flavobacteriaceae*, the CRISPR-

366 Cas systems in *Flavobacterium columnare* were shown to play a role in host-phage  
367 interactions, which drives long-term genome coevolution through arms-race-like mechanisms  
368 between the host and phages (79), serving as an example of genome stability. On the other  
369 hand, the CRISPR-Cas machinery appeared not to play a role as a resistance mechanism  
370 against phages in fish pathogenic *Flavobacterium psychrophilum* (80). Availability of the *E.*  
371 *anophelis* strains that possess CRISPR-Cas with and without ICEs enables further studies on  
372 co-evolution of mobile elements and host defense systems in the bacteria.

### 373 **Conclusion**

374 In this study, we identified ICEs in the genomes of 36 *E. anophelis* strains isolated from a  
375 wide array of hosts, collected at diverse geographic locations over several decades. The ICEs  
376 can be categorized into three types based on the distinctive architecture of conjugation  
377 module and integration sites. The identification of the ICEs enables further studies on the  
378 genetic diversity of the pan-genome and its impact on the virulence of this global  
379 opportunistic pathogen.

### 380 **Materials and Methods**

#### 381 **Bacterial strains**

382 In this study, complete genomes of 13 strains and draft genomes of 23 strains were analyzed  
383 (Table 1). Mosquito-derived strains were isolated from *An. gambiae* (R26<sup>T</sup>, Ag1), *An.*  
384 *stephensi* (As1) and *An. sinensis* (AR4-6, AR6-8). Strain CSID3015183678 was one of the  
385 strains associated with the Wisconsin outbreak 2015-2016, which has been characterized in  
386 (40), and strain NUHP1 was a representative of the strains isolated in the Singapore outbreak,  
387 the genomes of these strains have been described (35). Strain LDVH-AR107 was derived  
388 from a common carp *Cyprinus carpio*. Strain JM-87 was isolated from maize *Zea mays*,



389 which was originally described as *E. endophytica*. The genome comparison put it as a  
390 synonym of *E. anophelis* (7). The other strains were all derived from human patients or  
391 hospital environments, collected from 1950 to 2016.

392 The draft genomes of strains LDVH-AR107, 8707, NCTC10588, AmMS250 and 37-75 were  
393 reassembled using Illumina reads downloaded from SRA database. The reads were *de novo*  
394 assembled by CLC genomics workbench v 10.1.1. The genomes were annotated using the  
395 SEED and Rapid Annotations using Subsystems Technology (RAST) at the RAST server  
396 (81).

### 397 **Phylogenetic relationship of the strains based on core genome comparison**

398 The phylogenomic relationships of the strains were estimated by the Harvest suite (49). The  
399 core genome that is shared by all strains was identified by multiple genome alignment, and  
400 SNPs in the core genome were typed to infer phylogenies between the strains implemented  
401 by Parsnp module in the Harvest suite (49). Four complete genomes R26<sup>T</sup>, 0422,  
402 CSID3015183678 and NUHP1, each was used iteratively as the reference for tree  
403 construction, and tree topology of all four core genome trees was unaffected by choice of  
404 reference genome. The tree with 0422 as the reference was depicted in Figure 1.

### 405 **Identification of ICEs**

406 Pairwise genome comparison based on protein identity was used to identify variable regions.  
407 To identify an ICE, the genome was searched for a cluster of genes coding for a relaxase, a  
408 coupling ATPase (T4CP) and transfer (Tra) proteins including a VirB4 ATPase (TraG) in the  
409 conjugation module. These proteins are the key components of an ICE (28, 69). The  
410 boundary of an element was delimited as between the two open reading frames (ORFs) that  
411 flank the ICE. The genome of the type strain R26<sup>T</sup> was used as a reference to mark the

412 integration sites. Each ICE was categorized into one of the three Types based on its gene  
413 structure (Figure 2). The ICEs were named based mainly on the nomenclature proposed by  
414 Burrus *et al.* (82): the acronym ICE was followed by the initials of the name of the bacterium  
415 (*Ea*), a Roman numeral as type, a strain name and a ordinal number in brackets to identify the  
416 same sequence if it is encountered in a different strain. For example, the type I ICE found in  
417 both NUHP1 and CSID3015183678 would be named ICE*Ea*I(1)\_CSID3015183678 and  
418 ICE*Ea*I(1)\_NUHP1, respectively. Each type has its set of numbers; for example, the four  
419 type III ICEs in NUHP1 are designated as ICE*Ea*III(1)\_NUHP1 thru ICE*Ea*III(4)\_NUHP1.

420

#### 421 **GenBank accession numbers**

422 Accession numbers of the genomes used in this study were listed in Table 1. GenBank  
423 accession numbers for ICE sequences were listed in Table 2.

424

#### 425 **Supplemental Material**

426 Table S1. Annotated ICEs in the strains. (excel file)

427

#### 428 **Author contributions**

429 JX conceived and designed study. JX, DP, YL,QX collected genome data and performed data  
430 analysis. JX and AN wrote the manuscript.

431

#### 432 **Acknowledgements**

433 This work was supported by the National Institutes of Health [SC1AI112786 to J.X.] and  
434 the National Science Foundation [No. 1633330 to J.X.] and CDC program funds designated  
435 for the study of emerging infectious agents. The content is solely the responsibility of the  
436 authors and does not necessarily represent the official views of the National Institutes of

437 Health and the National Science Foundation, and the Centers for Disease Control and  
438 Prevention. Mention of company names or products does not constitute endorsement.  
439 Funding for open access charge: National Institutes of Health [SC1AI112786].

440

#### 441 **CONFLICT OF INTEREST**

442 None declared.

443

#### 444 **REFERENCES**

- 445 1. Kim KK, Kim MK, Lim JH, Park HY, Lee ST. 2005. Transfer of *Chryseobacterium*  
446 *meningosepticum* and *Chryseobacterium miricola* to *Elizabethkingia* gen. nov. as  
447 *Elizabethkingia meningoseptica* comb. nov. and *Elizabethkingia miricola* comb. nov.  
448 *Int J Syst Evol Microbiol* 55:1287-93.
- 449 2. King EO. 1959. Studies on a group of previously unclassified bacteria associated with  
450 meningitis in infants. *Am J Clin Pathol* 31:241-7.
- 451 3. Li Y, Kawamura Y, Fujiwara N, Naka T, Liu H, Huang X, Kobayashi K, Ezaki T.  
452 2003. *Chryseobacterium miricola* sp. nov., a novel species isolated from condensation  
453 water of space station Mir. *Syst Appl Microbiol* 26:523-8.
- 454 4. Kampfer P, Matthews H, Glaeser SP, Martin K, Lidders N, Faye I. 2011.  
455 *Elizabethkingia anophelis* sp. nov., isolated from the midgut of the mosquito  
456 *Anopheles gambiae*. *Int J Syst Evol Microbiol* 61:2670-5.
- 457 5. Lindh JM, Borg-Karlson AK, Faye I. 2008. Transstadial and horizontal transfer of  
458 bacteria within a colony of *Anopheles gambiae* (Diptera: Culicidae) and oviposition  
459 response to bacteria-containing water. *Acta Trop* 107:242-50.

- 460 6. Kampfer P, Busse HJ, McInroy JA, Glaeser SP. 2015. *Elizabethkingia endophytica* sp.  
461 nov., isolated from *Zea mays* and emended description of *Elizabethkingia*  
462 *anophelis* Kampfer et al. 2011. *Int J Syst Evol Microbiol* 65:2187-93.
- 463 7. Doijad S, Ghosh H, Glaeser S, Kampfer P, Chakraborty T. 2016. Taxonomic  
464 reassessment of the genus *Elizabethkingia* using whole-genome sequencing:  
465 *Elizabethkingia endophytica* Kampfer et al. 2015 is a later subjective synonym of  
466 *Elizabethkingia anophelis* Kampfer et al. 2011. *Int J Syst Evol Microbiol* 66:4555-  
467 4559.
- 468 8. Nicholson AC, Gulvik CA, Whitney AM, Humrighouse BW, Graziano J, Emery B,  
469 Bell M, Loparev V, Juieng P, Gartin J, Bizet C, Clermont D, Criscuolo A, Brisse S,  
470 McQuiston JR. 2017. Revisiting the taxonomy of the genus *Elizabethkingia* using  
471 whole-genome sequencing, optical mapping, and MALDI-TOF, along with proposal  
472 of three novel *Elizabethkingia* species: *Elizabethkingia bruuniana* sp. nov.,  
473 *Elizabethkingia ursingii* sp. nov., and *Elizabethkingia occulta* sp. nov. *Antonie Van*  
474 *Leeuwenhoek* doi:10.1007/s10482-017-0926-3.
- 475 9. Frank T, Gody JC, Nguyen LB, Berthet N, Le Fleche-Mateos A, Bata P, Rafai C,  
476 Kazanji M, Breurec S. 2013. First case of *Elizabethkingia anophelis* meningitis in the  
477 Central African Republic. *Lancet* 381:1876.
- 478 10. Teo J, Tan SY, Tay M, Ding Y, Kjelleberg S, Givskov M, Lin RT, Yang L. 2013.  
479 First case of *E. anophelis* outbreak in an intensive-care unit. *Lancet* 382:855-6.
- 480 11. Lau SK, Wu AK, Teng JL, Tse H, Curreem SO, Tsui SK, Huang Y, Chen JH, Lee RA,  
481 Yuen KY, Woo PC. 2015. Evidence for *Elizabethkingia anophelis* transmission from  
482 mother to infant, Hong Kong. *Emerg Infect Dis* 21:232-41.
- 483 12. Figueroa Castro CE, Johnson C, Williams M, VanDerSlik A, Graham MB, Letzer D,  
484 Ledebouer N, Buchan BW, Block T, Borlaug G, Munoz-Price LS. 2017.

- 485 Elizabethkingia anophelis: Clinical Experience of an Academic Health System in  
486 Southeastern Wisconsin. Open Forum Infect Dis 4:ofx251.
- 487 13. Navon L, Clegg WJ, Morgan J, Austin C, McQuiston JR, Blaney DD, Walters MS,  
488 Moulton-Meissner H, Nicholson A. 2016. Notes from the Field: Investigation of  
489 Elizabethkingia anophelis Cluster - Illinois, 2014-2016. MMWR Morb Mortal Wkly  
490 Rep 65:1380-1381.
- 491 14. Nicholson AC, Whitney AM, Emery BD, Bell ME, Gartin JT, Humrighouse BW,  
492 Loparev VN, Batra D, Sheth M, Rowe LA, Juieng P, Knipe K, Gulvik C, McQuiston  
493 JR. 2016. Complete Genome Sequences of Four Strains from the 2015-2016  
494 Elizabethkingia anophelis Outbreak. Genome Announc 4.
- 495 15. Hu S, Jiang T, Zhang X, Zhou Y, Yi Z, Wang Y, Zhao S, Wang M, Ming D, Chen S.  
496 2017. Elizabethkingia anophelis Isolated from Patients with Multiple Organ  
497 Dysfunction Syndrome and Lower Respiratory Tract Infection: Report of Two Cases  
498 and Literature Review. Front Microbiol 8:382.
- 499 16. Lin JN, Lai CH, Yang CH, Huang YH, Lin HH. 2017. Genomic features,  
500 phylogenetic relationships, and comparative genomics of Elizabethkingia anophelis  
501 strain EM361-97 isolated in Taiwan. Sci Rep 7:14317.
- 502 17. Lau SK, Chow WN, Foo CH, Curreem SO, Lo GC, Teng JL, Chen JH, Ng RH, Wu  
503 AK, Cheung IY, Chau SK, Lung DC, Lee RA, Tse CW, Fung KS, Que TL, Woo PC.  
504 2016. Elizabethkingia anophelis bacteremia is associated with clinically significant  
505 infections and high mortality. Sci Rep 6:26045.
- 506 18. Janda JM, Lopez DL. 2017. Mini review: New pathogen profiles: Elizabethkingia  
507 anophelis. Diagn Microbiol Infect Dis 88:201-205.

- 508 19. Kukutla P, Lindberg BG, Pei D, Rayl M, Yu W, Steritz M, Faye I, Xu J. 2013. Draft  
509 Genome Sequences of *Elizabethkingia anophelis* Strains R26T and Ag1 from the  
510 Midgut of the Malaria Mosquito *Anopheles gambiae*. *Genome Announc* 1.
- 511 20. Pei D, Nicholson AC, Jiang J, Chen H, Whitney AM, Villarma A, Bell M,  
512 Humrighouse B, Rowe LA, Sheth M, Batra D, Juieng P, Loparev VN, McQuiston JR,  
513 Lan Y, Ma Y, Xu J. 2017. Complete Circularized Genome Sequences of Four Strains  
514 of *Elizabethkingia anophelis*, Including Two Novel Strains Isolated from Wild-  
515 Caught *Anopheles sinensis*. *Genome Announc* 5.
- 516 21. Raygoza Garay JA, Hughes GL, Koundal V, Rasgon JL, Mwangi MM. 2016. Genome  
517 Sequence of *Elizabethkingia anophelis* Strain EaAs1, Isolated from the Asian Malaria  
518 Mosquito *Anopheles stephensi*. *Genome Announc* 4.
- 519 22. Georgiades K. 2012. Genomics of epidemic pathogens. *Clin Microbiol Infect* 18:213-  
520 7.
- 521 23. Raskin DM, Seshadri R, Pukatzki SU, Mekalanos JJ. 2006. Bacterial genomics and  
522 pathogen evolution. *Cell* 124:703-14.
- 523 24. Worby CJ, Lipsitch M, Hanage WP. 2017. Shared Genomic Variants: Identification  
524 of Transmission Routes Using Pathogen Deep-Sequence Data. *Am J Epidemiol*  
525 186:1209-1216.
- 526 25. Hu R, Yuan J, Meng Y, Wang Z, Gu Z. 2017. Pathogenic *Elizabethkingia miricola*  
527 Infection in Cultured Black-Spotted Frogs, China, 2016. *Emerg Infect Dis* 23:2055-  
528 2059.
- 529 26. Peter S, Oberhettinger P, Schuele L, Dinkelacker A, Vogel W, Dorfel D, Bezdán D,  
530 Ossowski S, Marschal M, Liese J, Willmann M. 2017. Genomic characterisation of  
531 clinical and environmental *Pseudomonas putida* group strains and determination of

- 532 their role in the transfer of antimicrobial resistance genes to *Pseudomonas aeruginosa*.  
533 *BMC Genomics* 18:859.
- 534 27. Bellanger X, Payot S, Leblond-Bourget N, Guedon G. 2014. Conjugative and  
535 mobilizable genomic islands in bacteria: evolution and diversity. *FEMS Microbiol*  
536 *Rev* 38:720-60.
- 537 28. Cury J, Touchon M, Rocha EPC. 2017. Integrative and conjugative elements and their  
538 hosts: composition, distribution and organization. *Nucleic Acids Res* 45:8943-8956.
- 539 29. Guglielmini J, Quintais L, Garcillan-Barcia MP, de la Cruz F, Rocha EP. 2011. The  
540 repertoire of ICE in prokaryotes underscores the unity, diversity, and ubiquity of  
541 conjugation. *PLoS Genet* 7:e1002222.
- 542 30. Wozniak RA, Fouts DE, Spagnoletti M, Colombo MM, Ceccarelli D, Garriss G, Dery  
543 C, Burrus V, Waldor MK. 2009. Comparative ICE genomics: insights into the  
544 evolution of the SXT/R391 family of ICEs. *PLoS Genet* 5:e1000786.
- 545 31. Wozniak RA, Waldor MK. 2010. Integrative and conjugative elements: mosaic  
546 mobile genetic elements enabling dynamic lateral gene flow. *Nat Rev Microbiol*  
547 8:552-63.
- 548 32. Johnson CM, Grossman AD. 2015. Integrative and Conjugative Elements (ICEs):  
549 What They Do and How They Work. *Annu Rev Genet* 49:577-601.
- 550 33. Colombi E, Straub C, Kunzel S, Templeton MD, McCann HC, Rainey PB. 2017.  
551 Evolution of copper resistance in the kiwifruit pathogen *Pseudomonas syringae* pv.  
552 *actinidiae* through acquisition of integrative conjugative elements and plasmids.  
553 *Environ Microbiol* 19:819-832.
- 554 34. Sugimoto M, Watada M, Jung SW, Graham DY, Yamaoka Y. 2012. Role of  
555 *Helicobacter pylori* plasticity region genes in development of gastroduodenal diseases.  
556 *J Clin Microbiol* 50:441-8.

- 557 35. Teo J, Tan SY, Liu Y, Tay M, Ding Y, Li Y, Kjelleberg S, Givskov M, Lin RT, Yang  
558 L. 2014. Comparative genomic analysis of malaria mosquito vector-associated novel  
559 pathogen *Elizabethkingia anophelis*. *Genome Biol Evol* 6:1158-65.
- 560 36. Li Y, Liu Y, Chew SC, Tay M, Salido MM, Teo J, Lauro FM, Givskov M, Yang L.  
561 2015. Complete Genome Sequence and Transcriptomic Analysis of the Novel  
562 Pathogen *Elizabethkingia anophelis* in Response to Oxidative Stress. *Genome Biol*  
563 *Evol* 7:1676-85.
- 564 37. Kukutla P, Lindberg BG, Pei D, Rayl M, Yu W, Steritz M, Faye I, Xu J. 2014.  
565 Insights from the genome annotation of *Elizabethkingia anophelis* from the malaria  
566 vector *Anopheles gambiae*. *PLoS One* 9:e97715.
- 567 38. Chew KL, Cheng B, Lin RTP, Teo JWP. 2018. *Elizabethkingia anophelis* Is the  
568 Dominant *Elizabethkingia* Species Found in Blood Cultures in Singapore. *J Clin*  
569 *Microbiol* 56.
- 570 39. Breurec S, Criscuolo A, Diancourt L, Rendueles O, Vandebogaert M, Passet V, Caro  
571 V, Rocha EP, Touchon M, Brisse S. 2016. Genomic epidemiology and global  
572 diversity of the emerging bacterial pathogen *Elizabethkingia anophelis*. *Sci Rep*  
573 6:30379.
- 574 40. Perrin A, Larssonneur E, Nicholson AC, Edwards DJ, Gundlach KM, Whitney AM,  
575 Gulvik CA, Bell ME, Rendueles O, Cury J, Hugon P, Clermont D, Enouf V, Loparev  
576 V, Juieng P, Monson T, Warshauer D, Elbadawi LI, Walters MS, Crist MB, Noble-  
577 Wang J, Borlaug G, Rocha EPC, Criscuolo A, Touchon M, Davis JP, Holt KE,  
578 McQuiston JR, Brisse S. 2017. Evolutionary dynamics and genomic features of the  
579 *Elizabethkingia anophelis* 2015 to 2016 Wisconsin outbreak strain. *Nat Commun*  
580 8:15483.



- 581 41. Deurenberg RH, Bathoorn E, Chlebowicz MA, Couto N, Ferdous M, Garcia-Cobos S,  
582 Kooistra-Smid AM, Raangs EC, Rosema S, Veloo AC, Zhou K, Friedrich AW,  
583 Rossen JW. 2017. Application of next generation sequencing in clinical microbiology  
584 and infection prevention. *J Biotechnol* 243:16-24.
- 585 42. Tagini F, Greub G. 2017. Bacterial genome sequencing in clinical microbiology: a  
586 pathogen-oriented review. *Eur J Clin Microbiol Infect Dis* 36:2007-2020.
- 587 43. Vernikos G, Medini D, Riley DR, Tettelin H. 2015. Ten years of pan-genome  
588 analyses. *Curr Opin Microbiol* 23:148-54.
- 589 44. Robinson ER, Walker TM, Pallen MJ. 2013. Genomics and outbreak investigation:  
590 from sequence to consequence. *Genome Med* 5:36.
- 591 45. Sun G, Wang L, Bao C, Li T, Ma L, Chen L. 2015. Complete Genome Sequence of  
592 *Elizabethkingia meningoseptica*, Isolated from a T-Cell Non-Hodgkin's Lymphoma  
593 Patient. *Genome Announc* 3.
- 594 46. Medini D, Donati C, Tettelin H, Massignani V, Rappuoli R. 2005. The microbial pan-  
595 genome. *Curr Opin Genet Dev* 15:589-94.
- 596 47. Tettelin H, Massignani V, Cieslewicz MJ, Donati C, Medini D, Ward NL, Angiuoli SV,  
597 Crabtree J, Jones AL, Durkin AS, Deboy RT, Davidsen TM, Mora M, Scarselli M,  
598 Margarit y Ros I, Peterson JD, Hauser CR, Sundaram JP, Nelson WC, Madupu R,  
599 Brinkac LM, Dodson RJ, Rosovitz MJ, Sullivan SA, Daugherty SC, Haft DH,  
600 Selengut J, Gwinn ML, Zhou L, Zafar N, Khouri H, Radune D, Dimitrov G, Watkins  
601 K, O'Connor KJ, Smith S, Utterback TR, White O, Rubens CE, Grandi G, Madoff LC,  
602 Kasper DL, Telford JL, Wessels MR, Rappuoli R, Fraser CM. 2005. Genome analysis  
603 of multiple pathogenic isolates of *Streptococcus agalactiae*: implications for the  
604 microbial "pan-genome". *Proc Natl Acad Sci U S A* 102:13950-5.

- 605 48. Leekitcharoenphon P, Kaas RS, Thomsen MC, Friis C, Rasmussen S, Aarestrup FM.  
606 2012. snpTree--a web-server to identify and construct SNP trees from whole genome  
607 sequence data. *BMC Genomics* 13 Suppl 7:S6.
- 608 49. Treangen TJ, Ondov BD, Koren S, Phillippy AM. 2014. The Harvest suite for rapid  
609 core-genome alignment and visualization of thousands of intraspecific microbial  
610 genomes. *Genome Biol* 15:524.
- 611 50. Seaver LC, Imlay JA. 2001. Alkyl hydroperoxide reductase is the primary scavenger  
612 of endogenous hydrogen peroxide in *Escherichia coli*. *J Bacteriol* 183:7173-81.
- 613 51. Oliveira PH, Touchon M, Rocha EP. 2014. The interplay of restriction-modification  
614 systems with mobile genetic elements and their prokaryotic hosts. *Nucleic Acids Res*  
615 42:10618-31.
- 616 52. Venter H, Mowla R, Ohene-Agyei T, Ma S. 2015. RND-type drug efflux pumps  
617 from Gram-negative bacteria: molecular mechanism and inhibition. *Front Microbiol*  
618 6:377.
- 619 53. Mohanraju P, Makarova KS, Zetsche B, Zhang F, Koonin EV, van der Oost J. 2016.  
620 Diverse evolutionary roots and mechanistic variations of the CRISPR-Cas systems.  
621 *Science* 353:aad5147.
- 622 54. Koonin EV, Makarova KS, Zhang F. 2017. Diversity, classification and evolution of  
623 CRISPR-Cas systems. *Curr Opin Microbiol* 37:67-78.
- 624 55. Bobossi-Serengbe G, Gody JC, Beyam NE, Bercion R. 2006. [First documented case  
625 of *Chryseobacterium meningosepticum* meningitis in Central African Republic]. *Med*  
626 *Trop (Mars)* 66:182-4.
- 627 56. Bentley SD, Parkhill J. 2015. Genomic perspectives on the evolution and spread of  
628 bacterial pathogens. *Proc Biol Sci* 282:20150488.

- 629 57. Mira A, Martin-Cuadrado AB, D'Auria G, Rodriguez-Valera F. 2010. The bacterial  
630 pan-genome: a new paradigm in microbiology. *Int Microbiol* 13:45-57.
- 631 58. Wang Y, Gilbreath TM, 3rd, Kukutla P, Yan G, Xu J. 2011. Dynamic gut microbiome  
632 across life history of the malaria mosquito *Anopheles gambiae* in Kenya. *PLoS One*  
633 6:e24767.
- 634 59. Telang A, Skinner J, Nemitz RZ, McClure AM. 2018. Metagenome and Culture-  
635 Based Methods Reveal Candidate Bacterial Mutualists in the Southern House  
636 Mosquito (Diptera: Culicidae). *J Med Entomol* doi:10.1093/jme/tjy056.
- 637 60. Terenius O, Lindh JM, Eriksson-Gonzales K, Bussiere L, Laugen AT, Bergquist H,  
638 Titanji K, Faye I. 2012. Midgut bacterial dynamics in *Aedes aegypti*. *FEMS*  
639 *Microbiol Ecol* 80:556-65.
- 640 61. Burrus V, Waldor MK. 2004. Shaping bacterial genomes with integrative and  
641 conjugative elements. *Res Microbiol* 155:376-86.
- 642 62. Malanowska K, Salyers AA, Gardner JF. 2006. Characterization of a conjugative  
643 transposon integrase, IntDOT. *Mol Microbiol* 60:1228-40.
- 644 63. Nguyen M, Vedantam G. 2011. Mobile genetic elements in the genus *Bacteroides*,  
645 and their mechanism(s) of dissemination. *Mob Genet Elements* 1:187-196.
- 646 64. Wang Y, Wang GR, Shelby A, Shoemaker NB, Salyers AA. 2003. A newly  
647 discovered *Bacteroides* conjugative transposon, CTnGERM1, contains genes also  
648 found in gram-positive bacteria. *Appl Environ Microbiol* 69:4595-603.
- 649 65. Laprise J, Yoneji S, Gardner JF. 2013. IntDOT interactions with core sites during  
650 integrative recombination. *J Bacteriol* 195:1883-91.
- 651 66. Whittle G, Shoemaker NB, Salyers AA. 2002. Characterization of genes involved in  
652 modulation of conjugal transfer of the *Bacteroides* conjugative transposon CTnDOT.  
653 *J Bacteriol* 184:3839-47.

- 654 67. Waters JL, Salyers AA. 2013. Regulation of CTnDOT conjugative transfer is a  
655 complex and highly coordinated series of events. *MBio* 4:e00569-13.
- 656 68. Wood MM, Gardner JF. 2015. The Integration and Excision of CTnDOT. *Microbiol*  
657 *Spectr* 3:MDNA3-0020-2014.
- 658 69. Guglielmini J, Neron B, Abby SS, Garcillan-Barcia MP, de la Cruz F, Rocha EP.  
659 2014. Key components of the eight classes of type IV secretion systems involved in  
660 bacterial conjugation or protein secretion. *Nucleic Acids Res* 42:5715-27.
- 661 70. Au KG, Clark S, Miller JH, Modrich P. 1989. *Escherichia coli* mutY gene encodes an  
662 adenine glycosylase active on G-A mispairs. *Proc Natl Acad Sci U S A* 86:8877-81.
- 663 71. Michaels ML, Pham L, Nghiem Y, Cruz C, Miller JH. 1990. MutY, an adenine  
664 glycosylase active on G-A mispairs, has homology to endonuclease III. *Nucleic Acids*  
665 *Res* 18:3841-5.
- 666 72. Murray NE. 2000. Type I restriction systems: sophisticated molecular machines (a  
667 legacy of Bertani and Weigle). *Microbiol Mol Biol Rev* 64:412-34.
- 668 73. Nikaido H, Pages JM. 2012. Broad-specificity efflux pumps and their role in  
669 multidrug resistance of Gram-negative bacteria. *FEMS Microbiol Rev* 36:340-63.
- 670 74. Gallegos MT, Schleif R, Bairoch A, Hofmann K, Ramos JL. 1997. Arac/XylS family  
671 of transcriptional regulators. *Microbiol Mol Biol Rev* 61:393-410.
- 672 75. Yang J, Tauschek M, Robins-Browne RM. 2011. Control of bacterial virulence by  
673 AraC-like regulators that respond to chemical signals. *Trends Microbiol* 19:128-35.
- 674 76. Tan A, Petty NK, Hocking D, Bennett-Wood V, Wakefield M, Praszkie J, Tauschek  
675 M, Yang J, Robins-Browne R. 2015. Evolutionary adaptation of an AraC-like  
676 regulatory protein in *Citrobacter rodentium* and *Escherichia* species. *Infect Immun*  
677 83:1384-95.

- 678 77. Tobes R, Ramos JL. 2002. AraC-XylS database: a family of positive transcriptional  
679 regulators in bacteria. *Nucleic Acids Res* 30:318-21.
- 680 78. Koonin EV, Makarova KS. 2017. Mobile Genetic Elements and Evolution of  
681 CRISPR-Cas Systems: All the Way There and Back. *Genome Biol Evol* 9:2812-2825.
- 682 79. Laanto E, Hoikkala V, Ravantti J, Sundberg LR. 2017. Long-term genomic  
683 coevolution of host-parasite interaction in the natural environment. *Nat Commun*  
684 8:111.
- 685 80. Castillo D, Christiansen RH, Dalsgaard I, Madsen L, Middelboe M. 2015.  
686 Bacteriophage resistance mechanisms in the fish pathogen *Flavobacterium*  
687 *psychrophilum*: linking genomic mutations to changes in bacterial virulence factors.  
688 *Appl Environ Microbiol* 81:1157-67.
- 689 81. Overbeek R, Olson R, Pusch GD, Olsen GJ, Davis JJ, Disz T, Edwards RA, Gerdes S,  
690 Parrello B, Shukla M, Vonstein V, Wattam AR, Xia F, Stevens R. 2014. The SEED  
691 and the Rapid Annotation of microbial genomes using Subsystems Technology  
692 (RAST). *Nucleic Acids Res* 42:D206-14.
- 693 82. Burrus V, Pavlovic G, Decaris B, Guedon G. 2002. Conjugative transposons: the tip  
694 of the iceberg. *Mol Microbiol* 46:601-10.

695

696

697

698

699

700

701

702

703

704

705

706

707

708

709

710

711

712

713

714

715 **TABLE AND FIGURES LEGENDS**

716

717 **Table 1. *Elizabethkingia anophelis* strains in the study**

718

719 **Table 2. Types of ICEs identified in the strains**

720

721

722 **Figure 1. Evolutionary relationship and geographic locations of the strains.** (A) The

723 phylogenetic was tree derived from the core genome SNP comparison. Circles A-E

724 demonstrate the protein identity between the genomes in the corresponding clades. The

725 colour represents the percent identity when a genome was compared to the reference genome.

726 (B) Geographic distribution of the strains. The letters correspond to the clades in part A of

727 this figure.

728 **Figure 2. Schematic view of the architecture of conjugation modular genes in the three**  
729 **types of ICEs.**

730

731 **Figure 3. Integration sites of ICEs in different strains.** (A) Location of the *ICEEaI*

732 integration sites. (B) Location of the tRNA genes where *ICEEaII* and *ICEEaIII* integrated.

733 The ICE types were color-coded. Refer to Table 2 for strain information.

734 **Figure 4. Phylogenetic relationship of the genes *T4CP*, *relaxase*, *TraG* and *TraJ*.** The

735 nucleotide sequences from different ICEs were aligned and the evolutionary history was

736 inferred using the Neighbor-Joining method. The evolutionary distances were computed

737 using different models to reconstruct the phylogenetic trees with the bootstrap test using 1000

738 replicates, which generated similar tree topology. The consensus trees generated using

739 Kimura 2-parameter model were presented. The bootstrap values were shown on the node.

740

741

742

743



**(A)**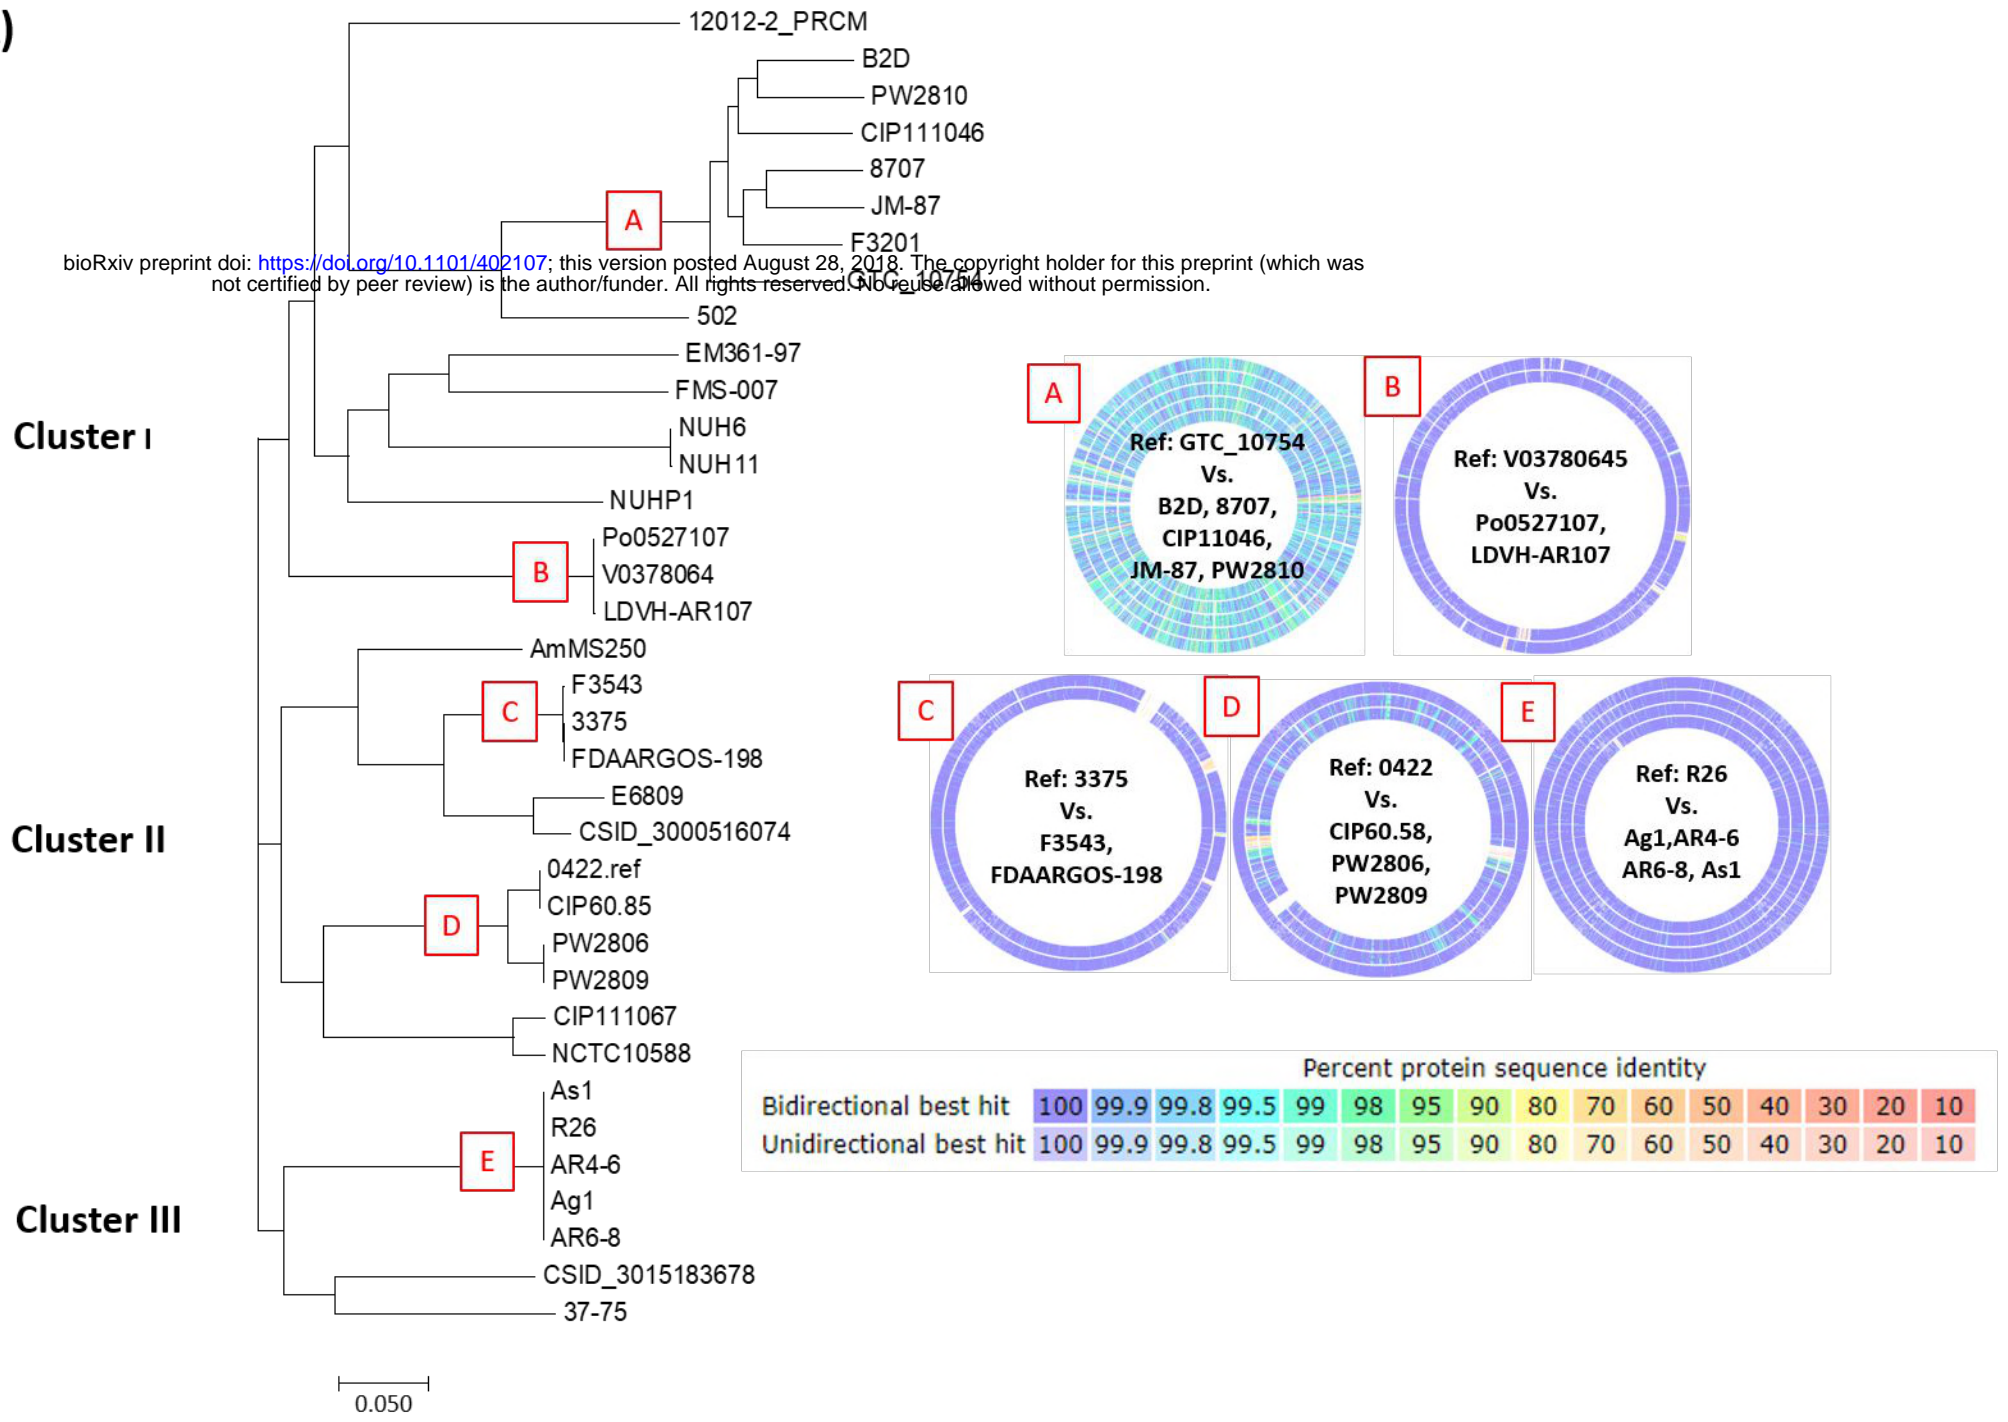**(B)**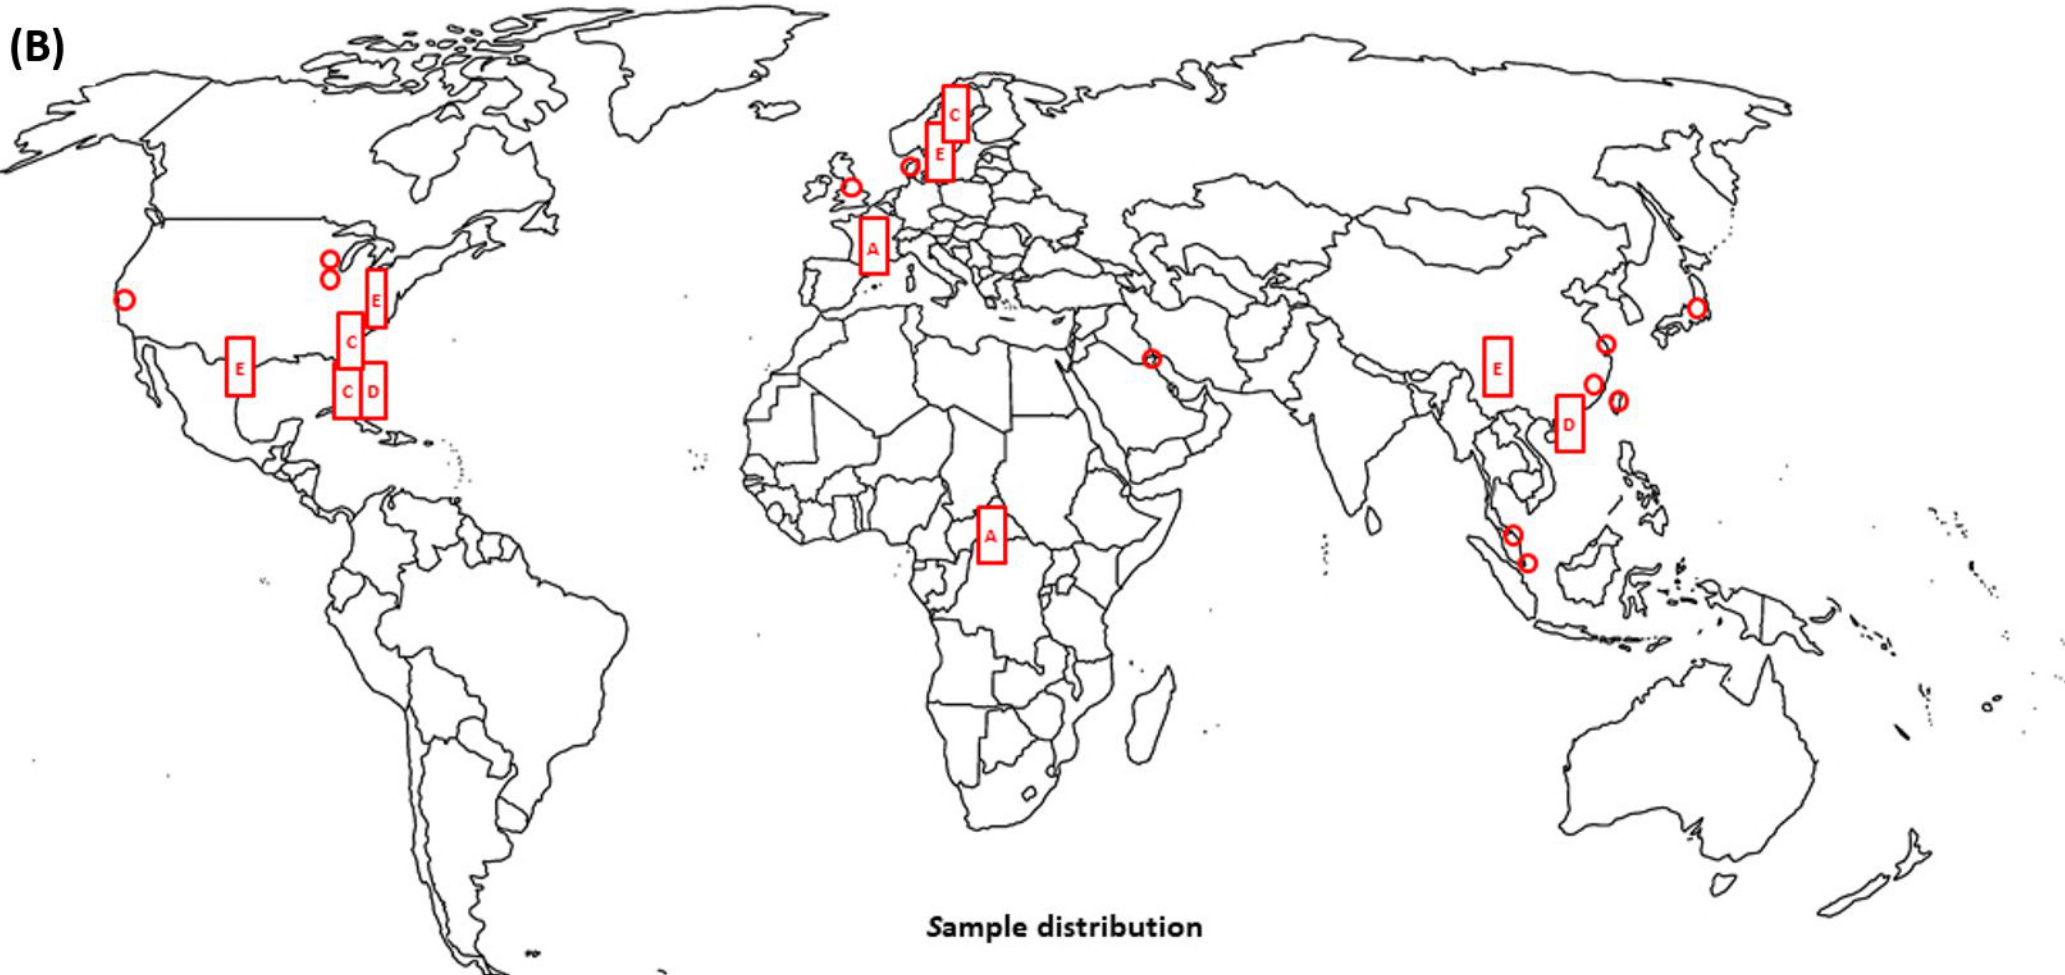



## Type

## Conjugation module genes

## Representative strain

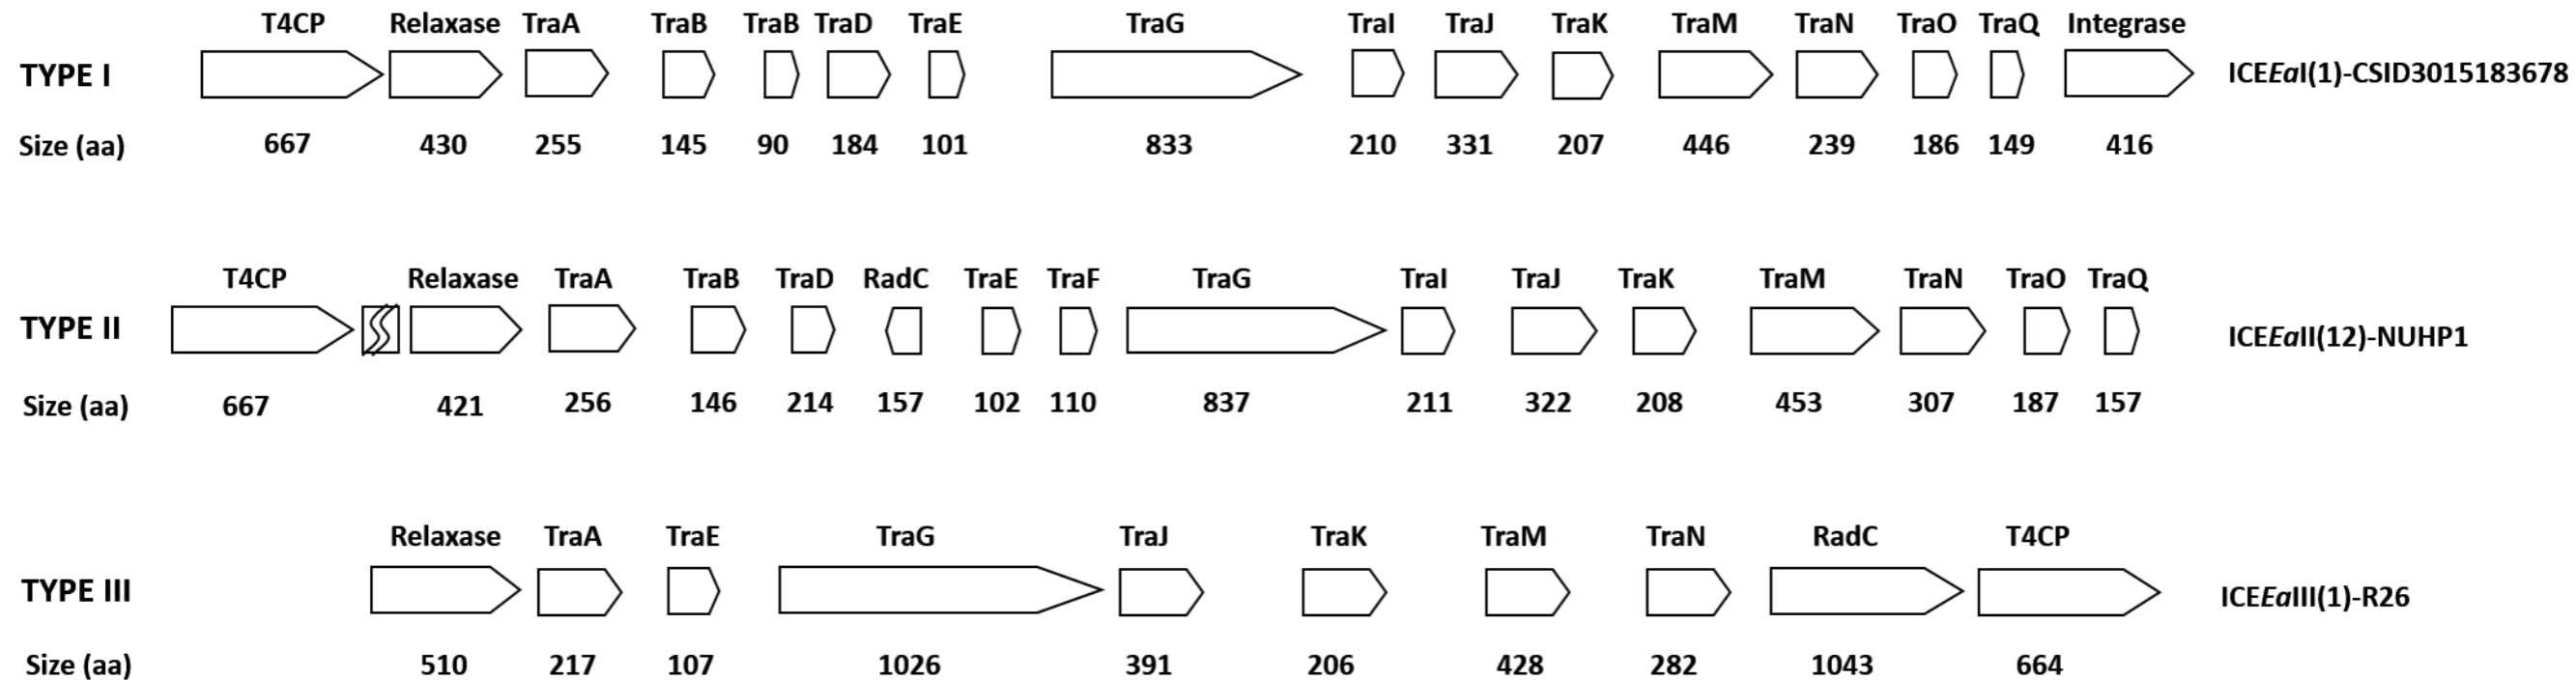

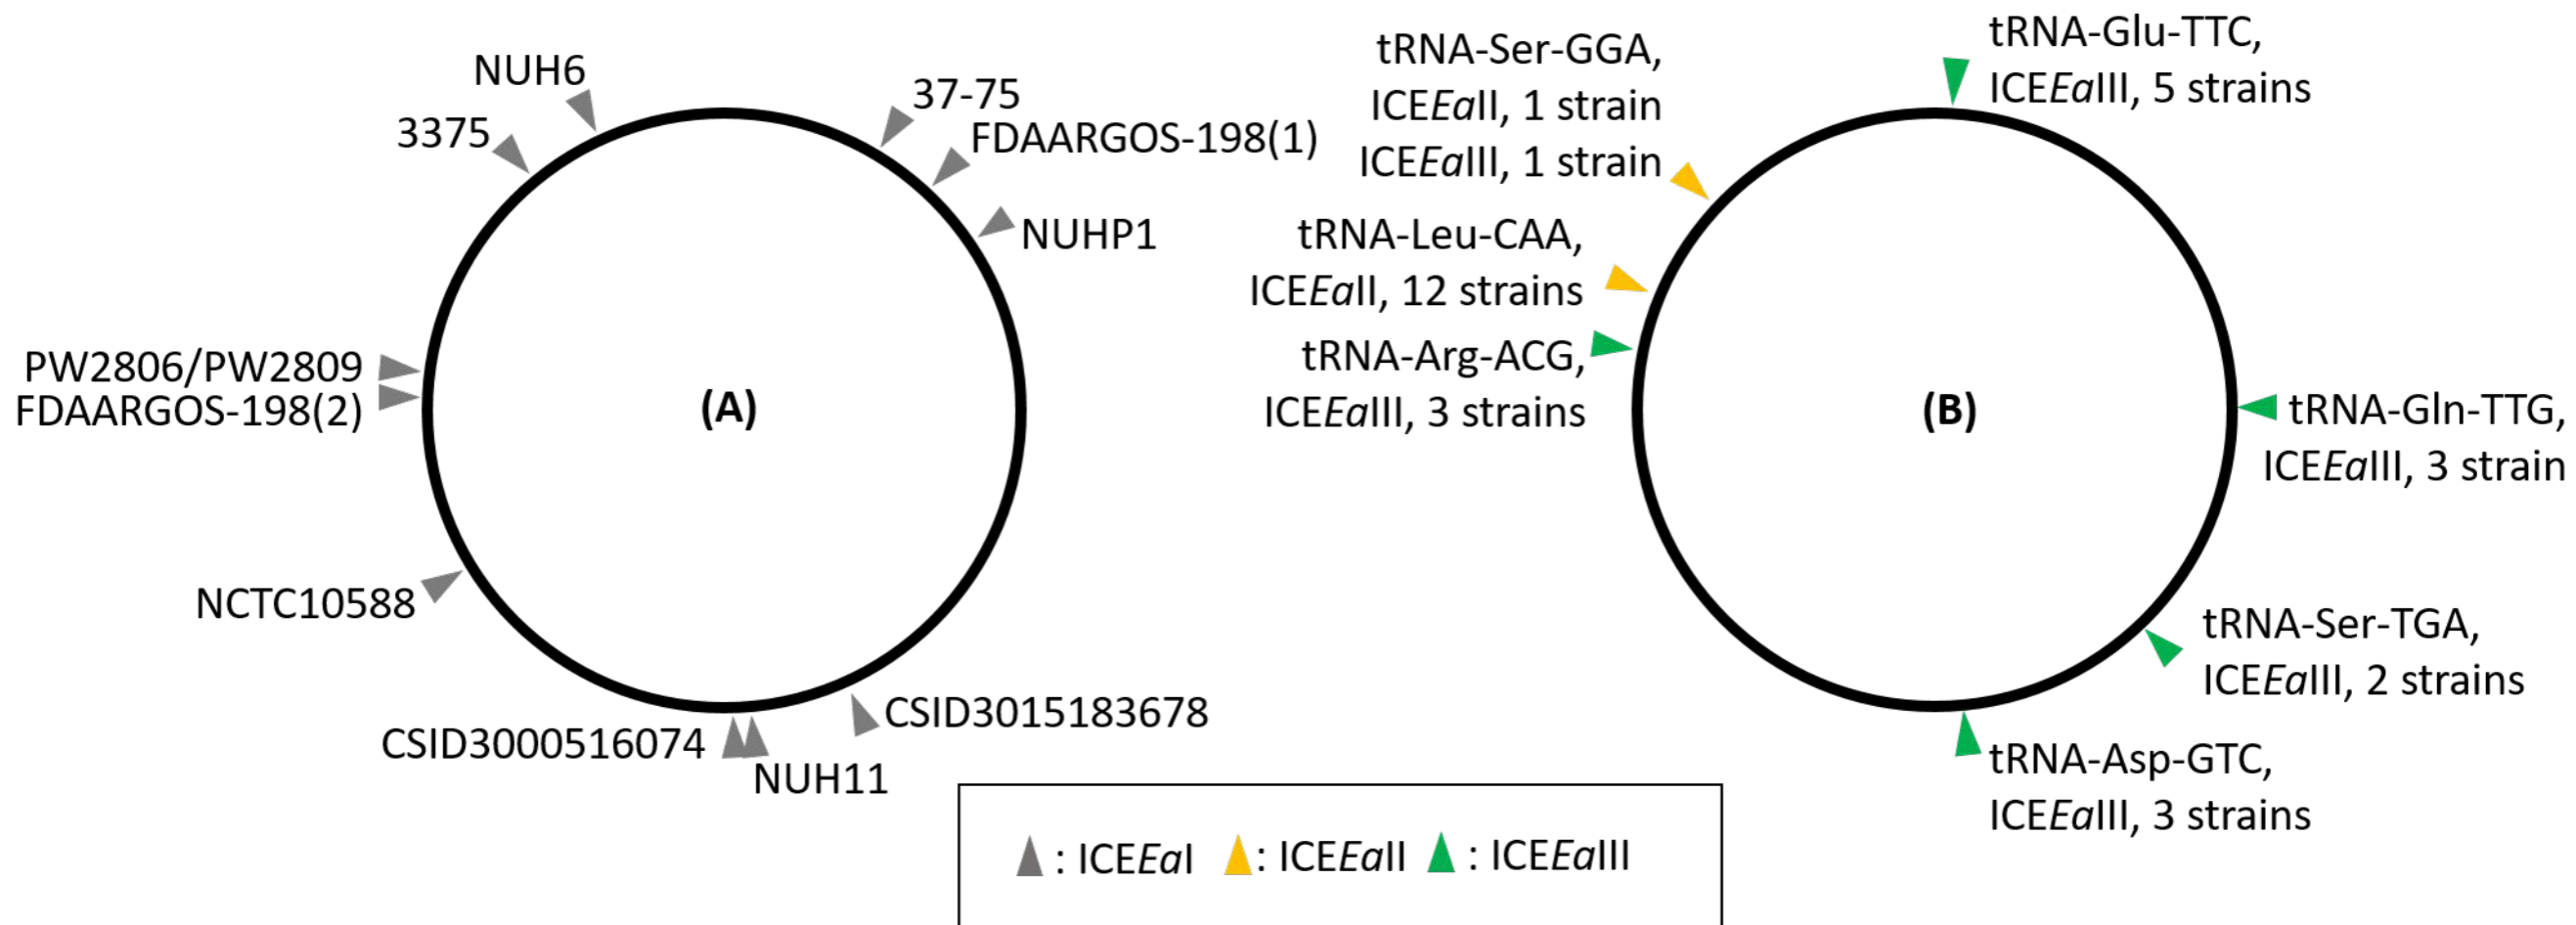

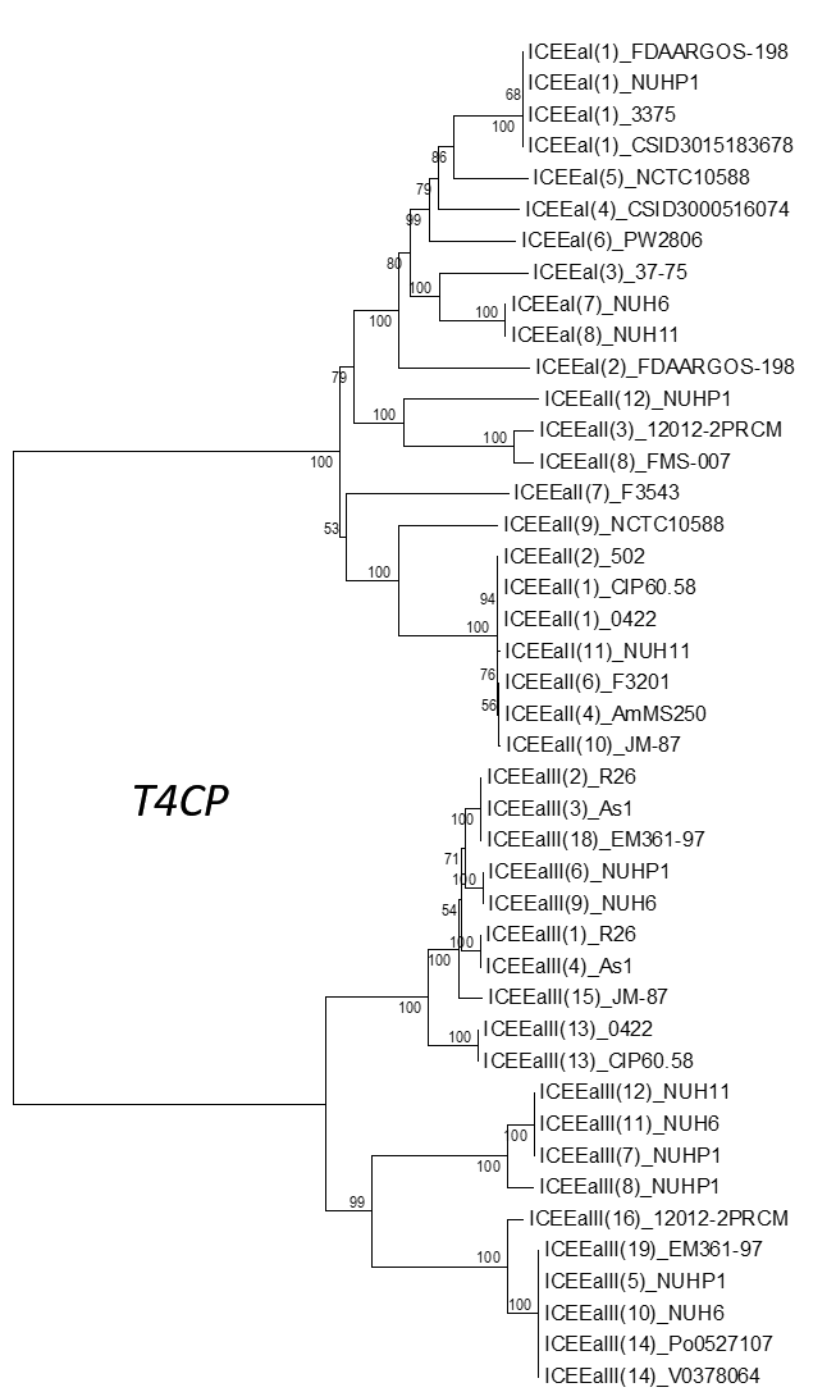

Type I

Type II

Type III

0.10

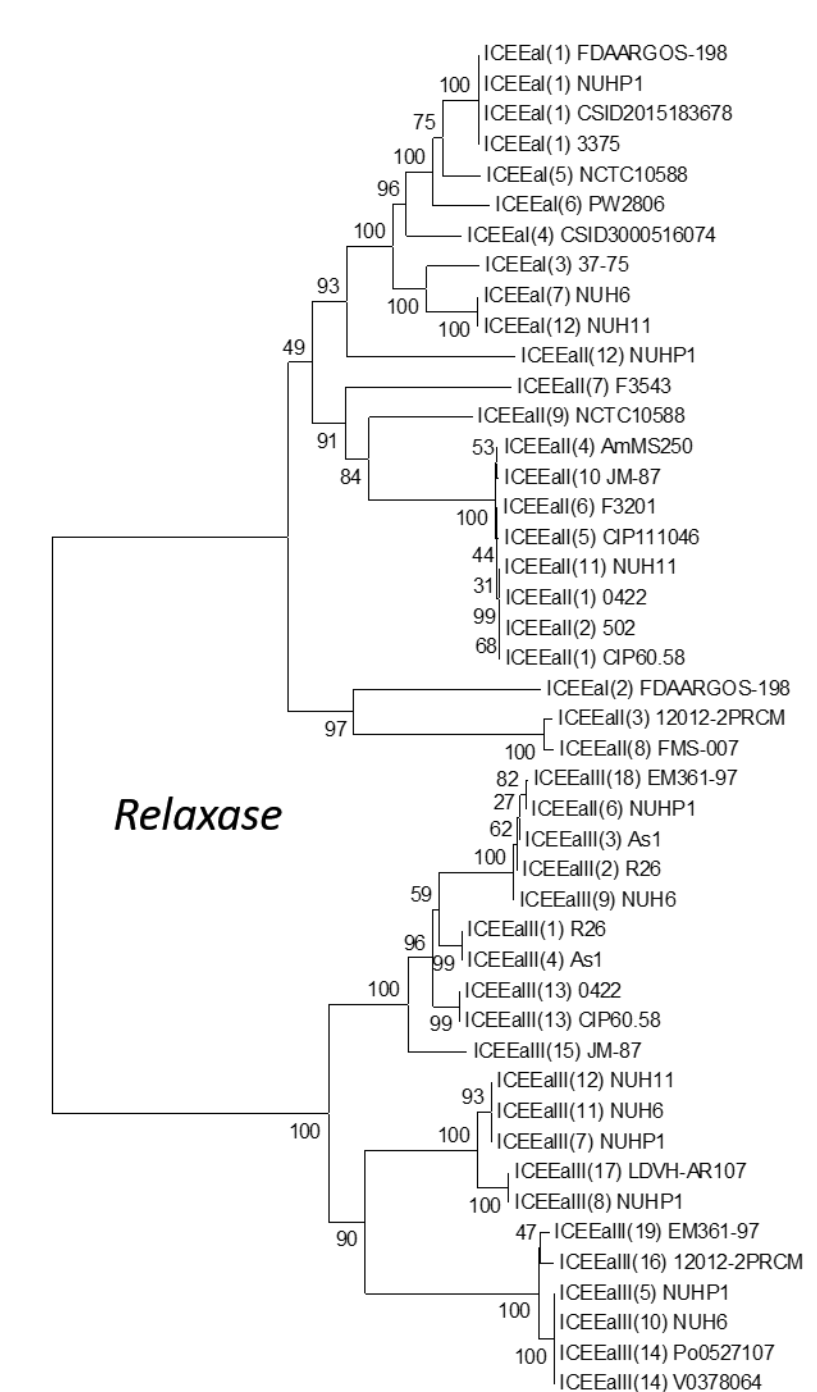

Type I

Type II

Type III

0.10

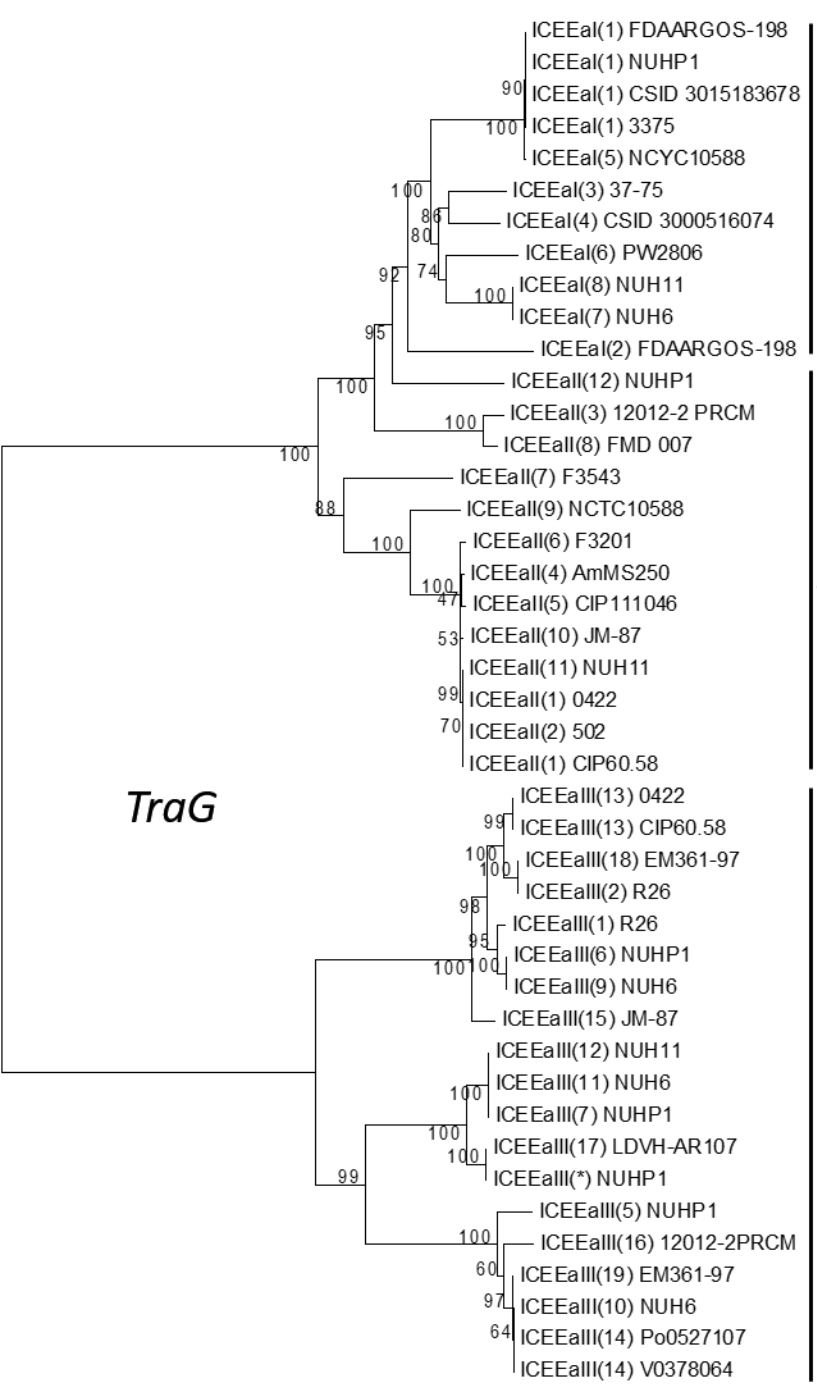

Type I

Type II

Type III

0.10

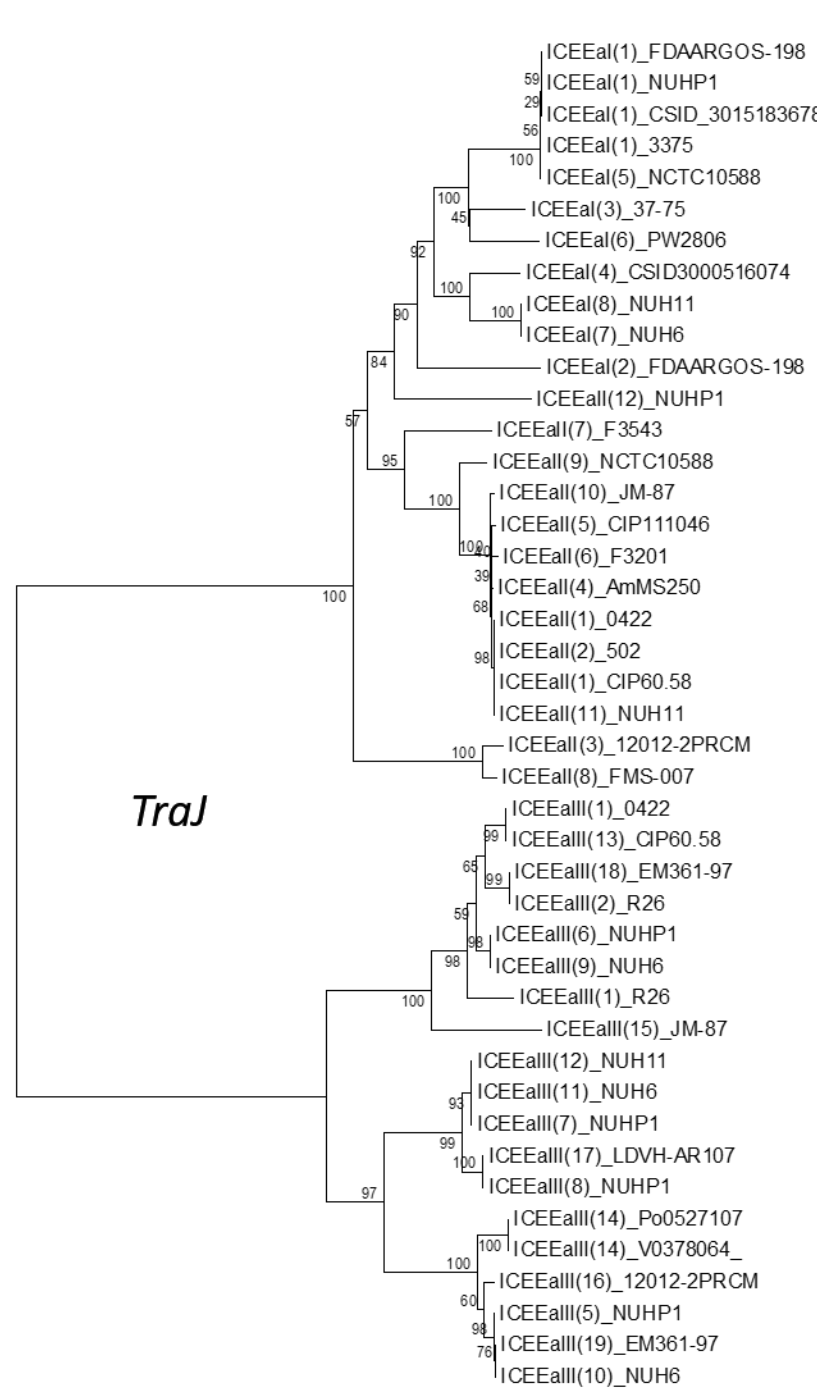

Type I

Type II

Type III

0.10

**Table 2. Types of ICEs identified in the strains**

| Element               | Strain                 | Integration site                          | Size (nt) | ICE TPA GenBank accession |
|-----------------------|------------------------|-------------------------------------------|-----------|---------------------------|
| ICE <i>Ea</i> I(1)    | 3375                   | Siroheme synthase and HP                  | 63,549    | BK010586                  |
| ICE <i>Ea</i> I(1)    | CSID3015183678         | Inside mutY                               | 62,894    | BK010587                  |
| ICE <i>Ea</i> I(1)    | FDAARGOS-198           | EngB and ElaA                             | 62,860    | BK010588                  |
| ICE <i>Ea</i> I(1)    | NUHP1                  | SlyD and HP                               | 62,960    | BK010589                  |
| ICE <i>Ea</i> I(2)    | FDAARGOS-198           | TonB receptor and HP                      | 69,029    | BK010590                  |
| ICE <i>Ea</i> I(3)    | 37-75                  | Inside Ahp                                | 65,419    | Not available**           |
| ICE <i>Ea</i> I(4)    | CSID3000516074         | HP and LuxR TF                            | 97,160    | BK010591                  |
| ICE <i>Ea</i> I(5)    | NCTC10588              | Macrolide-efflux protein and LytR/AlgR TR | 81,809    | Not available**           |
| ICE <i>Ea</i> I(6)    | PW2806, PW2809         | Efflux protein and peptidase              | 79,842    | BK010592                  |
| ICE <i>Ea</i> I(7)    | NUH6                   | TomB receptor and HP                      | 59,635    | BK010593                  |
| ICE <i>Ea</i> I(8)    | NUH11                  | tRNA-Asp-GTC*                             | 95,803    | BK010594                  |
| ICE <i>Ea</i> II(1)   | 0422                   | tRNA-Leu-CAA                              | 63,840    | BK010595                  |
| ICE <i>Ea</i> II(1)   | CIP60.58               | tRNA-Leu-CAA                              | 63,840    | BK010596                  |
| ICE <i>Ea</i> II(2)   | 502                    | tRNA-Leu-CAA                              | >34270    | BK010597                  |
| ICE <i>Ea</i> II(3)   | 12012-2 PRCM           | tRNA-Leu-CAA                              | >56734    | BK010598                  |
| ICE <i>Ea</i> II(4)   | AmMS250                | tRNA-Leu-CAA                              | >64773    | Not available**           |
| ICE <i>Ea</i> II(5)   | CIP111046              | tRNA-Leu-CAA                              | >22876    | BK010599                  |
| ICE <i>Ea</i> II(6)   | F3201                  | tRNA-Leu-CAA                              | 91,608    | BK010600                  |
| ICE <i>Ea</i> II(7)   | F3543                  | tRNA-Leu-CAA                              | 104,603   | BK010601                  |
| ICE <i>Ea</i> II(8)   | FMS-007                | tRNA-Leu-CAA                              | 73,167    | BK010602                  |
| ICE <i>Ea</i> II(9)   | NCTC10588              | tRNA-Leu-CAA                              | 67,087    | Not available**           |
| ICE <i>Ea</i> II(10)  | JM-87                  | tRNA-Leu-CAA                              | 36,967    | BK010603                  |
| ICE <i>Ea</i> II(11)  | NUH11                  | tRNA-Leu-CAA                              | >36957    | BK010604                  |
| ICE <i>Ea</i> II(12)  | NUHP1                  | tRNA-Ser-GGA                              | 71,591    | BK010605                  |
| ICE <i>Ea</i> III(1)  | R26, Ag1, Ar4-6, AR6-8 | tRNA-Ser-TGA                              | 101,692   | BK010606                  |
| ICE <i>Ea</i> III(2)  | R26, Ag1, Ar4-6, AR6-8 | tRNA-Arg-ACG                              | 77,358    | BK010607                  |
| ICE <i>Ea</i> III(3)  | As1                    | tRNA-Arg-ACG                              | >44,888   | BK010608                  |
| ICE <i>Ea</i> III(4)  | As1                    | tRNA-Ser-TGA                              | >31,354   | BK010609                  |
| ICE <i>Ea</i> III(5)  | NUHP1                  | tRNA-Glu-TTC                              | 60,900    | BK010610                  |
| ICE <i>Ea</i> III(6)  | NUHP1                  | tRNA-Glu-TTC                              | 74,499    | BK010611                  |
| ICE <i>Ea</i> III(7)  | NUHP1                  | tRNA-Asp-GTC                              | 116,331   | BK010625                  |
| ICE <i>Ea</i> III(8)  | NUHP1                  | tRNA-Asp-GTC                              | 109,040   | BK010626                  |
| ICE <i>Ea</i> III(9)  | NUH6                   | tRNA-Gln-TTG                              | >30166    | BK010612                  |
| ICE <i>Ea</i> III(10) | NUH6                   | tRNA-Glu-TTC                              | >33929    | BK010623                  |
| ICE <i>Ea</i> III(11) | NUH6                   | tRNA-Asp-GTC                              | >98049    | BK010613                  |
| ICE <i>Ea</i> III(12) | NUH11                  | Beta-lactamase*                           | 84,534    | BK010614                  |
| ICE <i>Ea</i> III(13) | 0422                   | tRNA-Gln-TTG                              | 67,662    | BK010615                  |
| ICE <i>Ea</i> III(13) | CIP60.58               | tRNA-Gln-TTG                              | 66,636    | BK010616                  |
| ICE <i>Ea</i> III(14) | Po0527107              | tRNA-Glu-TTC                              | >31721    | BK010617                  |
| ICE <i>Ea</i> III(14) | V0378064               | tRNA-Glu-TTC                              | >37189    | BK010618                  |
| ICE <i>Ea</i> III(15) | JM-87                  | tRNA-Ser-TGA                              | 73,828    | BK010624                  |
| ICE <i>Ea</i> III(16) | 12012-2 PRCM           | tRNA-Glu-TTC                              | >31732    | BK010619                  |
| ICE <i>Ea</i> III(17) | LDVH-AR107             | not determined                            | >24456    | BK010620                  |
| ICE <i>Ea</i> III(18) | EM361-97               | tRNA-Arg-ACG                              | 69,393    | BK010621                  |

---

\*Two elements in NUH11 combine together and integrate between tRNA-Asp-GTC and beta-lactamase. \*\* There are no assemblies in the NCBI database for these four strains. So we did not submit third party annotation (TPA) for these genomes to the GenBank. >: elements were partially assembled.

**Table 1.** *Elizabethkingia anophelis* strains in the study

| WGS Accession No.       | Level    | Lineage | Strain            | Source                             | Region                   | Collection Time | ICE type (n) <sup>a</sup> | CRISPR (n) <sup>b</sup> |
|-------------------------|----------|---------|-------------------|------------------------------------|--------------------------|-----------------|---------------------------|-------------------------|
| ERS1197909 <sup>c</sup> | Draft    | II      | AmMS250/CIP104057 | Human patient                      | US                       | 1994            | II (1)                    | No                      |
| CP023010.1              | Complete | II      | FDAARGOS-198      | Human patient                      | Sweden                   | Unknown         | I (2)                     | No                      |
| MAHA01                  | Draft    | II      | CSID 3000516074   | Human patient                      | Illinois, US             | 2016            | I (1)                     | No                      |
| CP016373.1              | Complete | II      | 3375              | Human patient                      | South Carolina, US       | 1957            | I (1)                     | No                      |
| MAHS01                  | Draft    | II      | E6809             | Human patient                      | California, US           | 1979            | II (1)                    | No                      |
| CP014340.1              | Complete | II      | F3543             | Human patient                      | Florida, US              | 1982            | II (1)                    | No                      |
| CP016370.1              | Complete | II      | 0422              | Human patient                      | Florida, US              | 1950            | II (1), III (1)           | No                      |
| FTQY01                  | Draft    | II      | CIP60.58          | Unknown                            | Unknown                  | Unknown         | II (1), III (1)           | No                      |
| CBYD01                  | Draft    | II      | PW2806            | Human patient                      | Hong Kong                | 2012            | I (1)                     | No                      |
| CBYE01                  | Draft    | II      | PW2809            | Human patient                      | Hong Kong                | 2012            | I (1)                     | No                      |
| ERS605480 <sup>c</sup>  | Draft    | II      | NCTC10588         | Human patient                      | US                       | 1959            | I (1), II (1)             | No                      |
| FTQZ01                  | Draft    | II      | CIP111067         | Unknown                            | Unknown                  | Unknown         | No ICE                    | Yes (37)                |
| CP014805.2              | Complete | III     | CSID 3015183678   | Human patient                      | Wisconsin, US            | 2016            | I (1)                     | No                      |
| ERS1197911 <sup>c</sup> | Draft    | III     | 37-75/CIP79.29    | Human patient                      | St Nazaire, France       | 1979            | I (1)                     | No                      |
| CP023401.1              | Complete | III     | R26               | Mosquito <i>An.gambiae</i>         | Stockholm, Sweden        | 2005            | III (2)                   | No                      |
| CP023402.1              | Complete | III     | Ag1               | Mosquito <i>An.gambiae</i>         | New Mexico, US           | 2012            | III (2)                   | No                      |
| CP023404.1              | Complete | III     | AR4-6             | Mosquito <i>An.sinensis</i>        | Sichuan, China           | 2015            | III (2)                   | No                      |
| CP023403.1              | Complete | III     | AR6-8             | Mosquito <i>An.sinensis</i>        | Sichuan, China           | 2015            | III (2)                   | No                      |
| LFKT01                  | Draft    | III     | As1               | Mosquito <i>An. stephensi</i>      | Pennsylvania, US         | 2015            | III (2)                   | No                      |
| CP007547.1              | Complete | I       | NUHP1             | Human patient                      | Singapore                | 2012            | I (1), II (1), III (4)    | No                      |
| ASYJ01                  | Draft    | I       | NUH6              | Human patient                      | Singapore                | 2012            | I (1), III (3)            | No                      |
| ASYK01                  | Draft    | I       | NUH11             | Human patient                      | Singapore                | 2012            | I (1), II (1), III (1)    | No                      |
| CCAC01                  | Draft    | I       | Po0527107         | Human patient                      | Central African Republic | 2006            | III (1)                   | Yes (21)                |
| CCAB01                  | Draft    | I       | V0378064          | Human patient                      | Central African Republic | 2011            | III (1)                   | Yes (23)                |
| FTPG01                  | Draft    | I       | LDVH-AR107        | Common carp <i>Cyprinus carpio</i> | Montpellier, France      | 2004            | III (1)                   | Yes (42)                |
| CP006576.1              | Complete | I       | FMS-007           | Human patient                      | China                    | 2015            | II (1)                    | Yes (15)                |
| LWDS01                  | Draft    | I       | EM361-97          | Human patient                      | Taiwan                   | 2000s           | III (1)                   | No                      |
| AVCQ01                  | Draft    | I       | 502               | Human patient                      | Birmingham, UK           | 2012            | II (1)                    | No                      |
| CP016374.1              | Complete | I       | F3201             | Human patient                      | Kuwait                   | 1982            | II (1)                    | No                      |
| CP016372.1              | Complete | I       | JM-87             | Corn <i>Zea mays</i>               | Alabama, US              | 2011            | II (1), III (1)           | No                      |
| ERS1197907 <sup>c</sup> | Draft    | I       | 8707/CIP78.9      | Human patient                      | NY, US                   | 1962            | No ICE                    | Yes                     |
| JNCG01                  | Draft    | I       | B2D               | Human patient                      | Malaysia                 | 2013            | No ICE                    | No                      |

|           |       |   |              |               |               |         |                 |          |
|-----------|-------|---|--------------|---------------|---------------|---------|-----------------|----------|
| FTRB01    | Draft | I | CIP111046    | Human patient | Unknown       | Unknown | II (1)          | Yes (6)  |
| CBYF01    | Draft | I | PW2010       | Human patient | Hong Kong     | 2012    | No ICE          | Yes (27) |
| DRS013860 | Draft | I | GTC_10754    | Unknown       | Japan         | 2014    | No ICE          | Yes (32) |
| LPXG01    | Draft | I | 12012-2 PRCM | Human patient | Fujian, China | 2009    | II (1), III (1) | No       |

<sup>a</sup>n: number of the ICEs in the type. <sup>b</sup>n: number of the spacers in the CRISPR locus. <sup>c</sup> There are no assemblies in the NCBI database for these four strains. We assembled the genomes from Illumina reads directly.
